# Supplementary material for: Self-assembly of a new class of rhenium(i)-based double stranded dinuclear monohelicates with their photophysical and electrochemical studies
Source: Royal Society of Chemistry journal article supplement (doi:10.1039/d2dt02657k), 2022-01-01
Supplement: d2dt02657k1.pdf [file d2dt02657k1.pdf]

*Supporting Information for*

# Self-assembly of a new class of rhenium(I)-based double stranded dinuclear monohelicates with their photophysical and electrochemical studies

Upasana Phukon,<sup>a</sup> Bhaskaran Shankar<sup>b</sup> and Malaichamy Sathiyendiran<sup>\*a</sup>

<sup>a</sup>School of Chemistry, University of Hyderabad, Hyderabad-500 046, India

<sup>b</sup>Department of Chemistry, Thiagarajar College of Engineering, Madurai-625 015, India

---

## Contents

**Figure S1.** <sup>1</sup>H NMR spectrum of L<sup>1</sup> in DMSO-*d*<sub>6</sub>.

**Figure S2.** <sup>1</sup>H-<sup>1</sup>H COSY NMR spectrum of L<sup>1</sup> in DMSO-*d*<sub>6</sub>.

**Figure S3.** <sup>1</sup>H-<sup>1</sup>H NOESY NMR spectrum of L<sup>1</sup> in DMSO-*d*<sub>6</sub>.

**Figure S4.** <sup>1</sup>H NMR spectrum of L<sup>2</sup> in DMSO-*d*<sub>6</sub>.

**Figure S5.** <sup>1</sup>H-<sup>1</sup>H COSY NMR spectrum of L<sup>2</sup> in DMSO-*d*<sub>6</sub>.

**Figure S6.** ESI mass spectrum of L<sup>1</sup> in positive ion mode.

**Figure S7.** ESI mass spectrum of L<sup>2</sup> in positive ion mode.

**Figure S8.** ATR-IR spectrum of **1**.

**Figure S9.** ATR-IR spectrum of **2**.

**Figure S10.** ATR-IR spectrum of **3**.

**Figure S11.** ATR-IR spectrum of **4**.

**Figure S12.** <sup>1</sup>H NMR spectrum of **1** in DMSO-*d*<sub>6</sub>.

**Figure S13.** <sup>1</sup>H NMR spectrum of **2** in DMSO-*d*<sub>6</sub>.

**Figure S14.** <sup>1</sup>H NMR spectrum of **3** in DMSO-*d*<sub>6</sub>.

**Figure S15.** <sup>1</sup>H NMR spectrum of **4** in DMSO-*d*<sub>6</sub>.

**Figure S16.** Partial <sup>1</sup>H NMR spectra of ligands and complexes **1** and **2** in DMSO-*d*<sub>6</sub>.

**Figure S17.** Partial <sup>1</sup>H NMR spectra of ligands and complexes **3** and **4** in DMSO-*d*<sub>6</sub>.

**Figure S18.** Partial variable temperature <sup>1</sup>H NMR spectrum of **1** in DMSO-*d*<sub>6</sub>.

**Figure S19.** Partial variable temperature <sup>1</sup>H NMR spectrum of **2** in DMSO-*d*<sub>6</sub>.

**Figure S20.** Partial variable temperature  $^1\text{H}$  NMR spectrum of **3** in  $\text{DMSO}-d_6$ .

**Figure S21.** Partial variable temperature  $^1\text{H}$  NMR spectrum of **4** in  $\text{DMSO}-d_6$ .

**Figure S22.** ESI mass spectrum of **1** in positive ion mode.

**Figure S23.** ESI mass spectrum of **2** in positive ion mode.

**Figure S24.** ESI mass spectrum of **3** in positive ion mode.

**Figure S25.** ESI mass spectrum of **4** in positive ion mode.

Cartesian coordinates of the optimized structure of **1** (Helicate).

Cartesian coordinates of the optimized structure of **1** (Mesocate).

Cartesian coordinates of the optimized structure of **2** (Helicate).

Cartesian coordinates of the optimized structure of **2** (Mesocate).

Cartesian coordinates of the optimized structure of **3** (Helicate).

Cartesian coordinates of the optimized structure of **3** (Mesocate).

Cartesian coordinates of the optimized structure of **4** (Helicate).

Cartesian coordinates of the optimized structure of **4** (Mesocate).

**Table S1.** Total energy and the difference in energies of complexes **1–4** (helicates and mesocates).

**Table S2.** Crystal data and structure refinement for **1**.

**Figure S26.** Simulated absorption spectrum of **1** in DMSO with oscillator strength ( $f$ ) values (shown as vertical bars, same color code).

**Figure S27.** Simulated absorption spectrum of **2** in DMSO with oscillator strength ( $f$ ) values (shown as vertical bars, same color code).

**Figure S28.** Simulated absorption spectrum of **3** in DMSO with oscillator strength ( $f$ ) values (shown as vertical bars, same color code).

**Figure S29.** Simulated absorption spectrum of **4** in DMSO with oscillator strength ( $f$ ) values (shown as vertical bars, same color code).

**Figure S30.** Frontier molecular orbitals involved in TDDFT/IEF-PCM transitions of **3**.

**Figure S31.** Frontier molecular orbitals involved in TDDFT/IEF-PCM transition of **4**.

**Figure S32.** Emission spectra of **1** ( $\lambda_{\text{exc}} = 270$  nm),  $\text{L}^1$  ( $\lambda_{\text{exc}} = 265$  nm), and  $\text{H}_2\text{-dhbq}$  ( $\lambda_{\text{exc}} = 285$  nm) in DMSO.

**Figure S33.** Emission spectra of **2** ( $\lambda_{\text{exc}} = 270$  nm),  $\text{L}^1$  ( $\lambda_{\text{exc}} = 265$  nm), and  $\text{H}_2\text{-pydc}$  ( $\lambda_{\text{exc}} = 277$  nm) in DMSO.

**Figure S34.** Emission spectra of **3** ( $\lambda_{\text{exc}} = 270 \text{ nm}$ ),  $L^2$  ( $\lambda_{\text{exc}} = 265 \text{ nm}$ ), and  $H_2\text{-dhbq}$  ( $\lambda_{\text{exc}} = 285 \text{ nm}$ ) in DMSO.

**Figure S35.** Emission spectra of **4** ( $\lambda_{\text{exc}} = 270 \text{ nm}$ ),  $L^2$  ( $\lambda_{\text{exc}} = 265 \text{ nm}$ ), and  $H_2\text{-pydc}$  ( $\lambda_{\text{exc}} = 277 \text{ nm}$ ) in DMSO.

**Table S3.** Major singlet excited state transitions for **3** from TDDFT/IEF-PCM calculations with DMSO as the solvent model.

**Table S4.** Major singlet excited state transitions for **4** from TDDFT/IEF-PCM calculations with DMSO as the solvent model.

**Table S5.** Free energies of activation calculated from the coalescence temperatures and the chemical shifts ( $^1\text{H}$  NMR, 500 MHz) of the signals of  $\text{dhbq}^{2-}$  protons in **1** and **3**,  $\text{pydc}^{2-}$  protons in **2** and **4**.

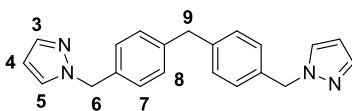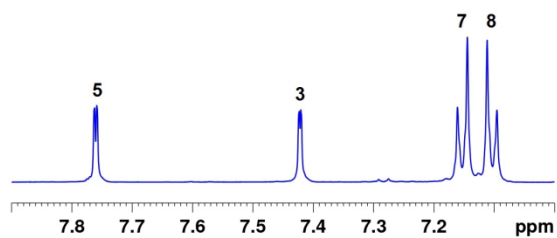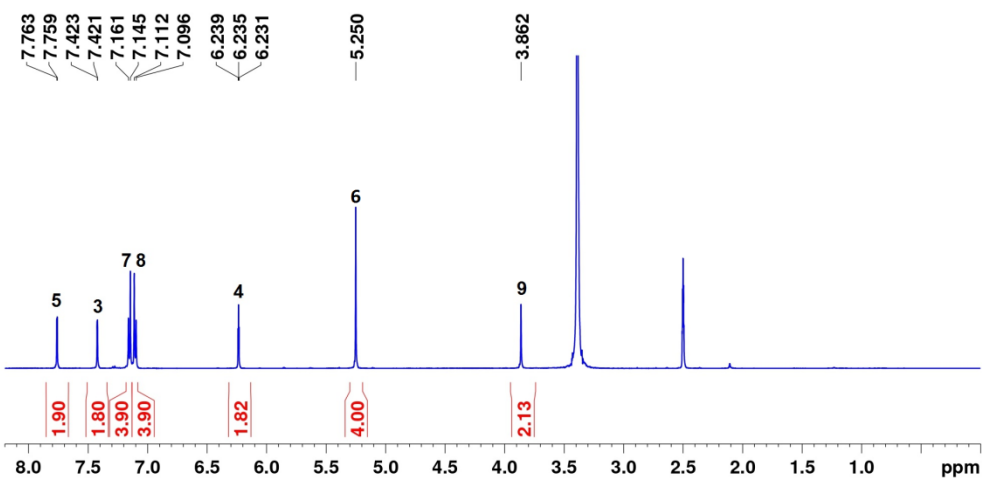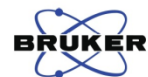

Current Data Parameters  
 NAME UP-L1-Helicates 1-2  
 EXPNO 85  
 PROCNO 1

F2 - Acquisition Parameters  
 Date\_ 20210317  
 Time 12.02 h  
 INSTRUM spect  
 PROBHD Z119470\_0291 (  
 PULPROG zg30  
 TD 65536  
 SOLVENT DMSO  
 NS 16  
 DS 2  
 SWH 10000.000 Hz  
 FIDRES 0.305176 Hz  
 AQ 3.2767999 sec  
 RG 62.04  
 DW 50.000 usec  
 DE 6.50 usec  
 TE 298.3 K  
 D1 1.00000000 sec  
 TD0 1  
 SFO1 500.3720898 MHz  
 NUC1 1H  
 P1 10.00 usec  
 PLW1 23.23100090 W

F2 - Processing parameters  
 SI 65536  
 SF 500.3690040 MHz  
 WDW EM  
 SSB 0  
 LB 0.30 Hz  
 GB 0  
 PC 1.00

Figure S1.  $^1\text{H}$  NMR spectrum of  $\text{L}^1$  in  $\text{DMSO}-d_6$ .

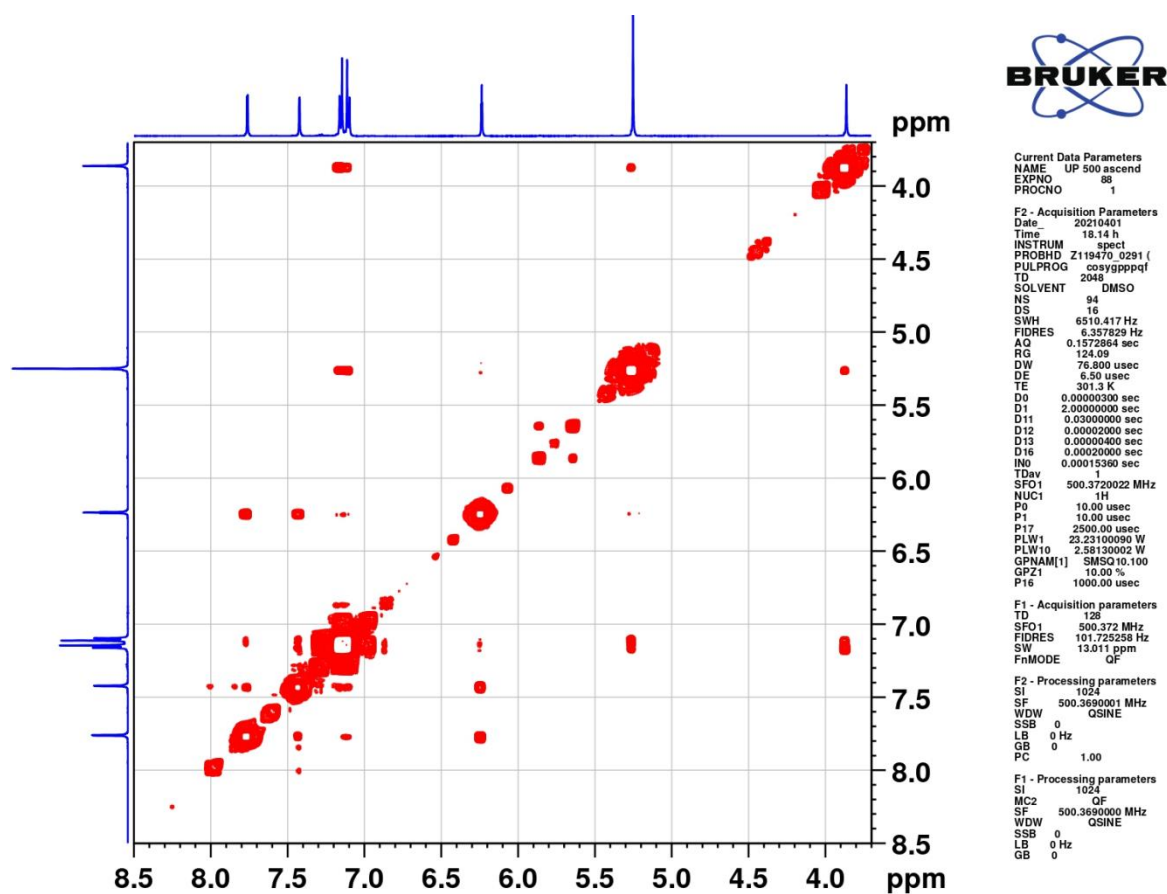

Figure S2.  $^1\text{H}$ - $^1\text{H}$  COSY NMR spectrum of  $\text{L}^1$  in  $\text{DMSO}-d_6$ .

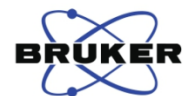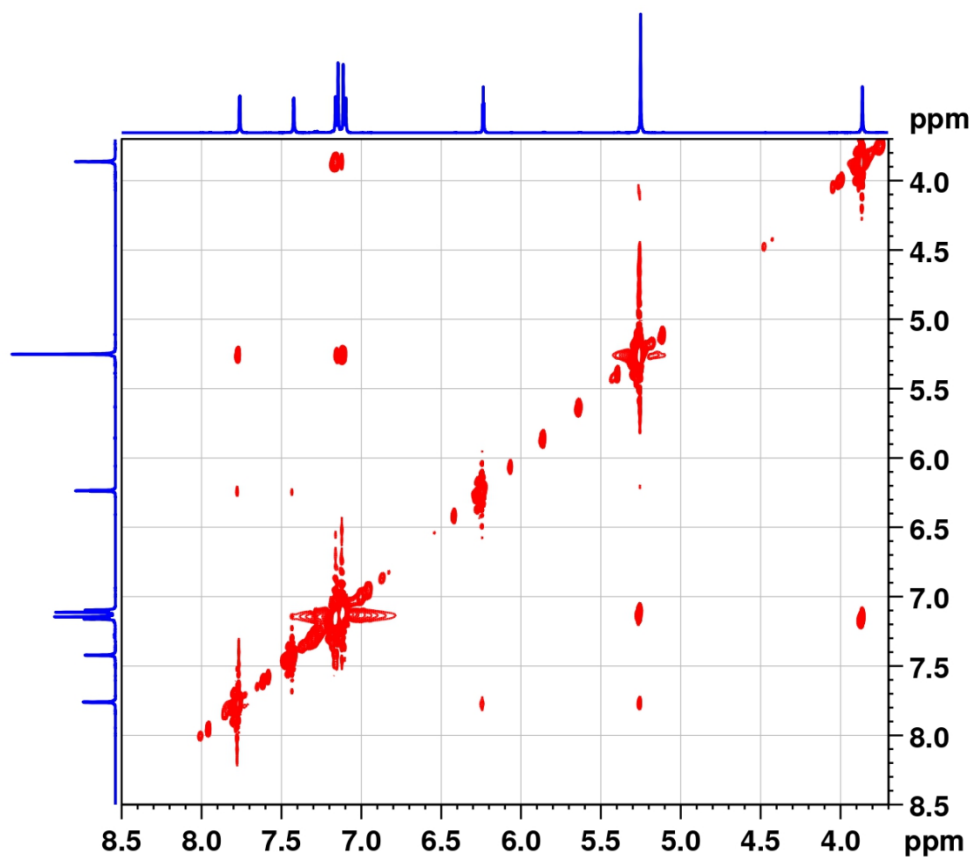

```
Current Data Parameters
NAME      UP 500 ascend
EXPNO     89
PROCNO    1

F2 - Acquisition Parameters
Date_     20210402
Time      1.39 h
INSTRUM   spect
PROBHD    Z119470_0291 (
PULPROG   noesy9pphpp
TD         2048
SOLVENT   DMSO
NS         84
DS         32
SWH        5000.000 Hz
FIDRES     4.882813 Hz
AQ         0.2048000 sec
RG         62.04
DW         100.000 usec
DE         6.50 usec
TE         299.1 K
D0         0.00008727 sec
D1         2.00000000 sec
D8         0.30000001 sec
D11        0.03000000 sec
D12        0.00002000 sec
D16        0.00020000 sec
IN0        0.00020000 sec
TDav      1
SFO1      500.3713517 MHz
NUC1      1H
P1         10.00 usec
P2         20.00 usec
PT7        2500.00 usec
PLW1       23.23100090 W
PLW10      2.58130002 W
GPRNAM[1] SMSG10.100
GPZ1       40.00 %
P16        1000.00 usec

F1 - Acquisition parameters
TD         256
SFO1      500.3714 MHz
FIDRES     28.062500 Hz
SW         9.993 ppm
FnMODE     States-TPPI

F2 - Processing parameters
SI         1024
SF         500.3690000 MHz
WDW        OSINE
SSB        2
LB         0 Hz
GB         0
PC         1.00

F1 - Processing parameters
SI         1024
MC2        States-TPPI
SF         500.3690000 MHz
WDW        OSINE
SSB        2
LB         0 Hz
GB         0
```

Figure S3.  $^1\text{H}$ - $^1\text{H}$  NOESY NMR spectrum of  $\text{L}^1$  in  $\text{DMSO}-d_6$ .

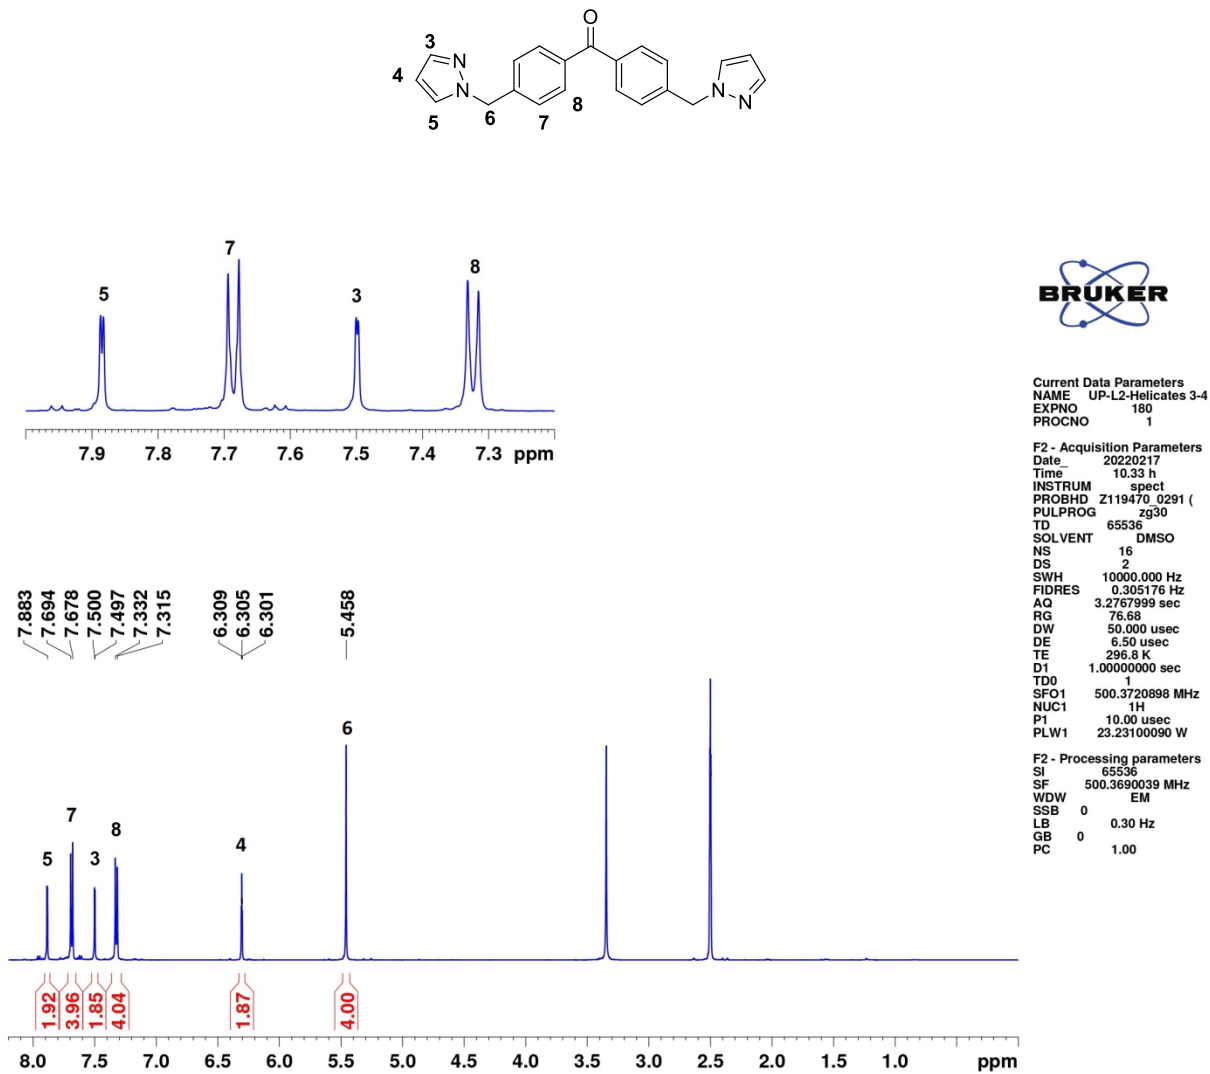

Figure S4. <sup>1</sup>H NMR spectrum of L<sup>2</sup> in DMSO-d<sub>6</sub>.

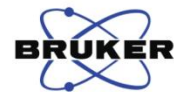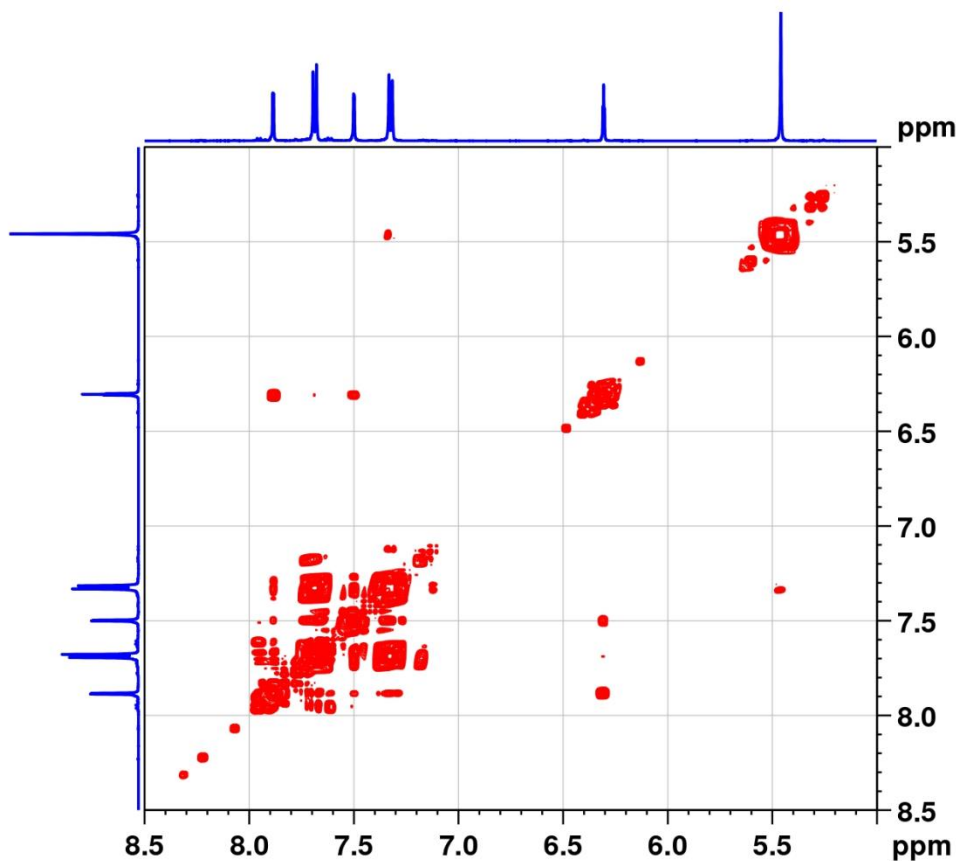

Current Data Parameters  
NAME UP 500 ascend  
EXPNO 197  
PROCNO 1

F2 - Acquisition Parameters  
Date\_ 20220322  
Time 17.40 h  
INSTRUM spect  
PROBHD Z125331 0034 (  
PULPROG cosygpppqf  
TD 2048  
SOLVENT DMSO  
NS 128  
DS 16  
SWH 6510.417 Hz  
FIDRES 6.357829 Hz  
AQ 0.1572864 sec  
RG 192.83  
DW 76.800 usec  
DE 6.50 usec  
TE 298.1 K  
D0 0.00000300 sec  
D1 2.00000000 sec  
D11 0.03000000 sec  
D12 0.00020000 sec  
D13 0.00000400 sec  
D16 0.00020000 sec  
IN0 0.00015360 sec  
TDev 1  
SFO1 500.372022 MHz  
NUC1 1H  
P0 8.00 usec  
P1 8.00 usec  
P17 2500.00 usec  
PLW1 12.18000031 W  
PLW10 0.86612999 W  
GPNAM[1] SMSO10.100  
GPZ1 10.00 %  
P16 1000.00 usec

F1 - Acquisition parameters  
TD 128  
SFO1 500.372 MHz  
FIDRES 101.725258 Hz  
SW 13.011 ppm  
FnMODE QF

F2 - Processing parameters  
SI 1024  
SF 500.3690000 MHz  
WDW QSINE  
SSB 0  
LB 0 Hz  
GB 0  
PC 1.00

F1 - Processing parameters  
SI 1024  
NC2 QF  
SF 500.3690000 MHz  
WDW QSINE  
SSB 0  
LB 0 Hz  
GB 0

Figure S5.  $^1\text{H}$ - $^1\text{H}$  COSY NMR spectrum of  $\text{L}^2$  in  $\text{DMSO}-d_6$ .



**Acquisition Parameter**

|             |            |                      |          |                  |           |
|-------------|------------|----------------------|----------|------------------|-----------|
| Source Type | ESI        | Ion Polarity         | Positive | Set Nebulizer    | 0.3 Bar   |
| Focus       | Not active | Set Capillary        | 4500 V   | Set Dry Heater   | 180 °C    |
| Scan Begin  | 50 m/z     | Set End Plate Offset | -500 V   | Set Dry Gas      | 4.0 l/min |
| Scan End    | 2000 m/z   | Set Charging Voltage | 0 V      | Set Divert Valve | Waste     |
|             |            | Set Corona           | 0 nA     | Set APCI Heater  | 0 °C      |

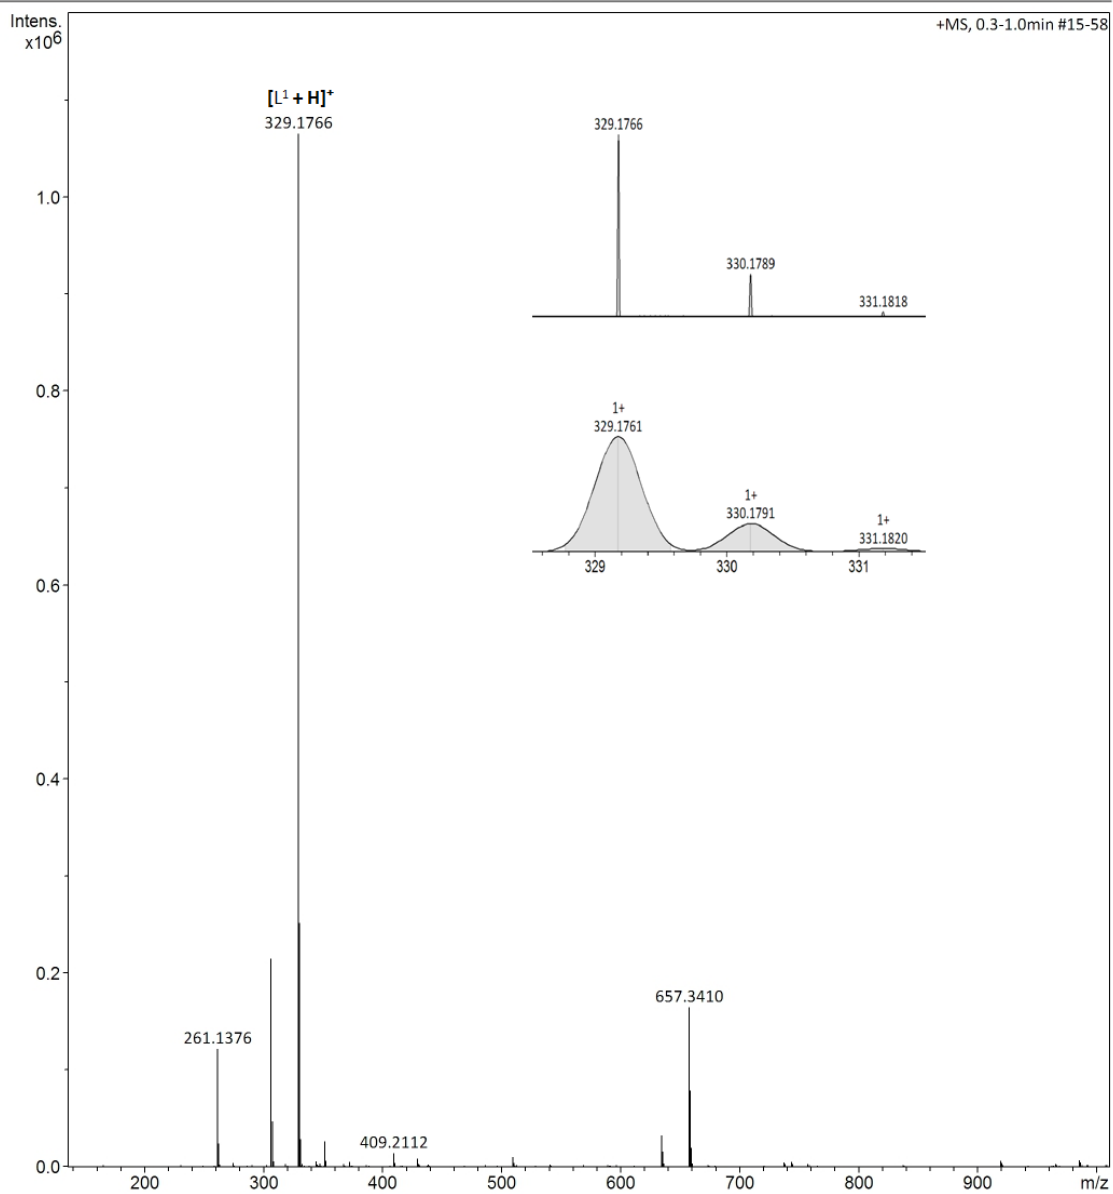

**Figure S6.** ESI mass spectrum of L<sup>1</sup> in positive ion mode (simulated pattern in inset).

**Acquisition Parameter**

|             |            |                      |          |                  |           |
|-------------|------------|----------------------|----------|------------------|-----------|
| Source Type | ESI        | Ion Polarity         | Positive | Set Nebulizer    | 0.3 Bar   |
| Focus       | Not active | Set Capillary        | 4500 V   | Set Dry Heater   | 180 °C    |
| Scan Begin  | 50 m/z     | Set End Plate Offset | -500 V   | Set Dry Gas      | 4.0 l/min |
| Scan End    | 2000 m/z   | Set Charging Voltage | 0 V      | Set Divert Valve | Waste     |
|             |            | Set Corona           | 0 nA     | Set APCI Heater  | 0 °C      |

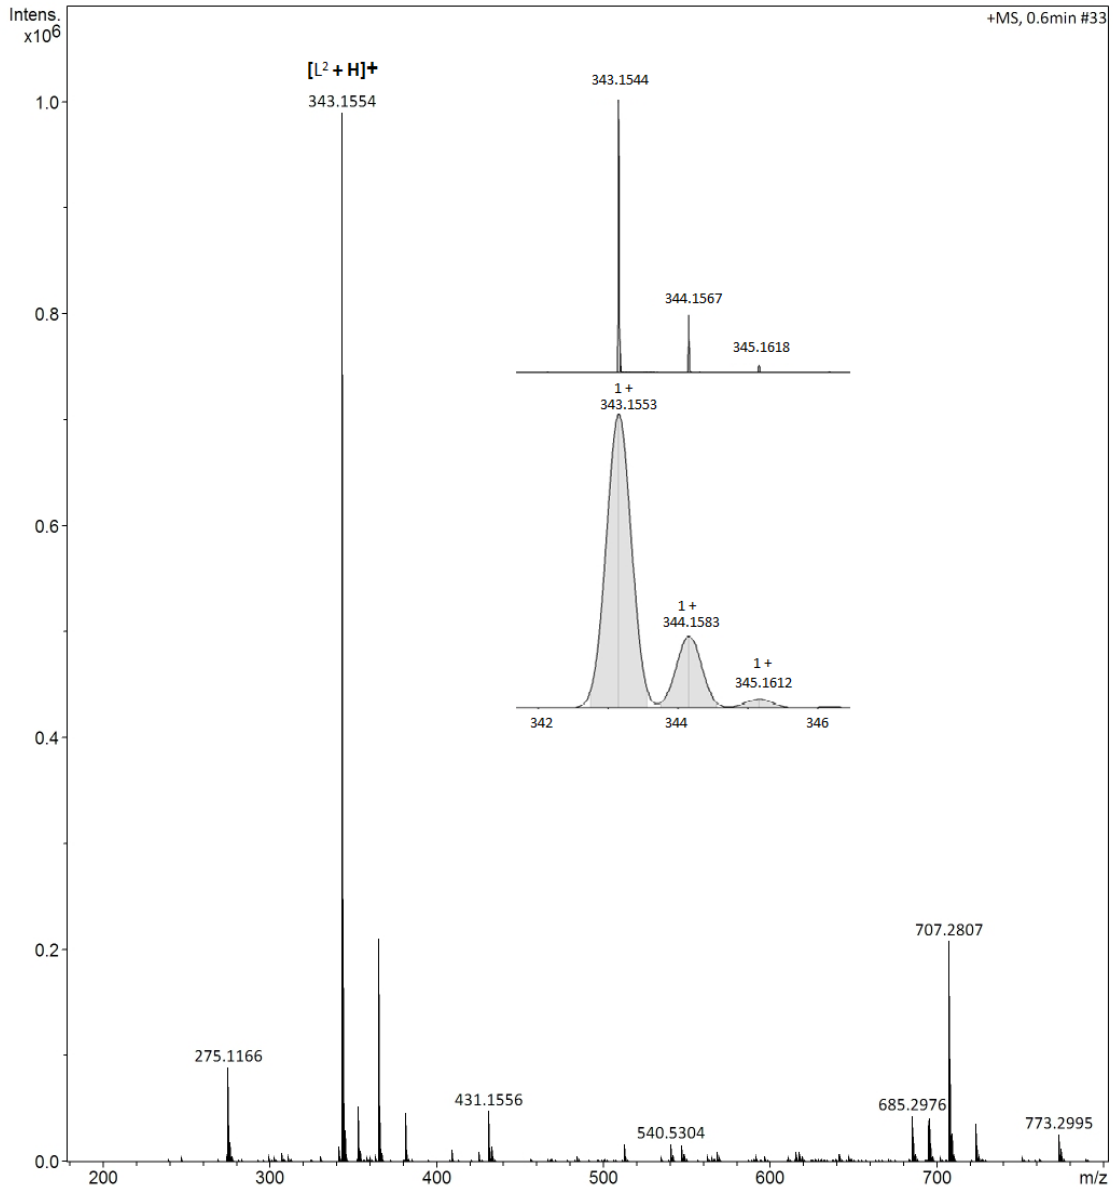

**Figure S7.** ESI mass spectrum of L<sup>2</sup> in positive ion mode (simulated pattern in inset).

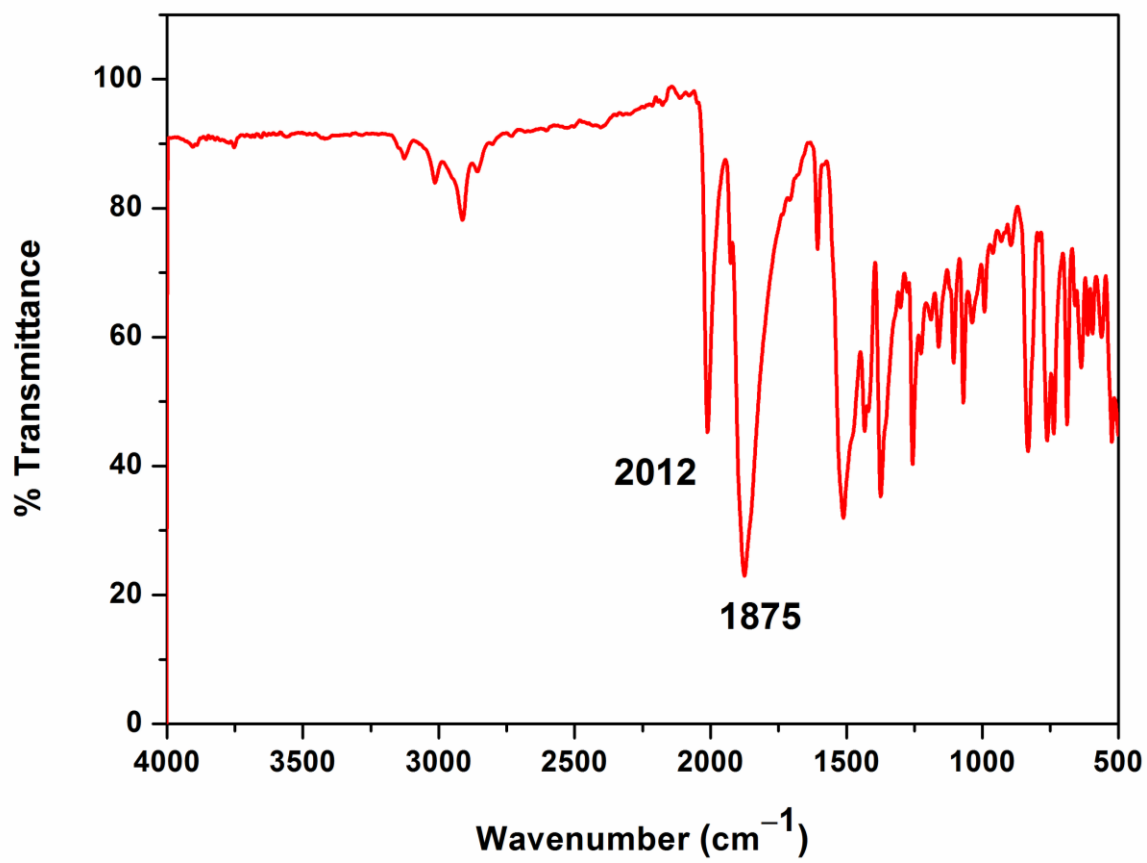

**Figure S8.** ATR-IR spectrum of **1**.

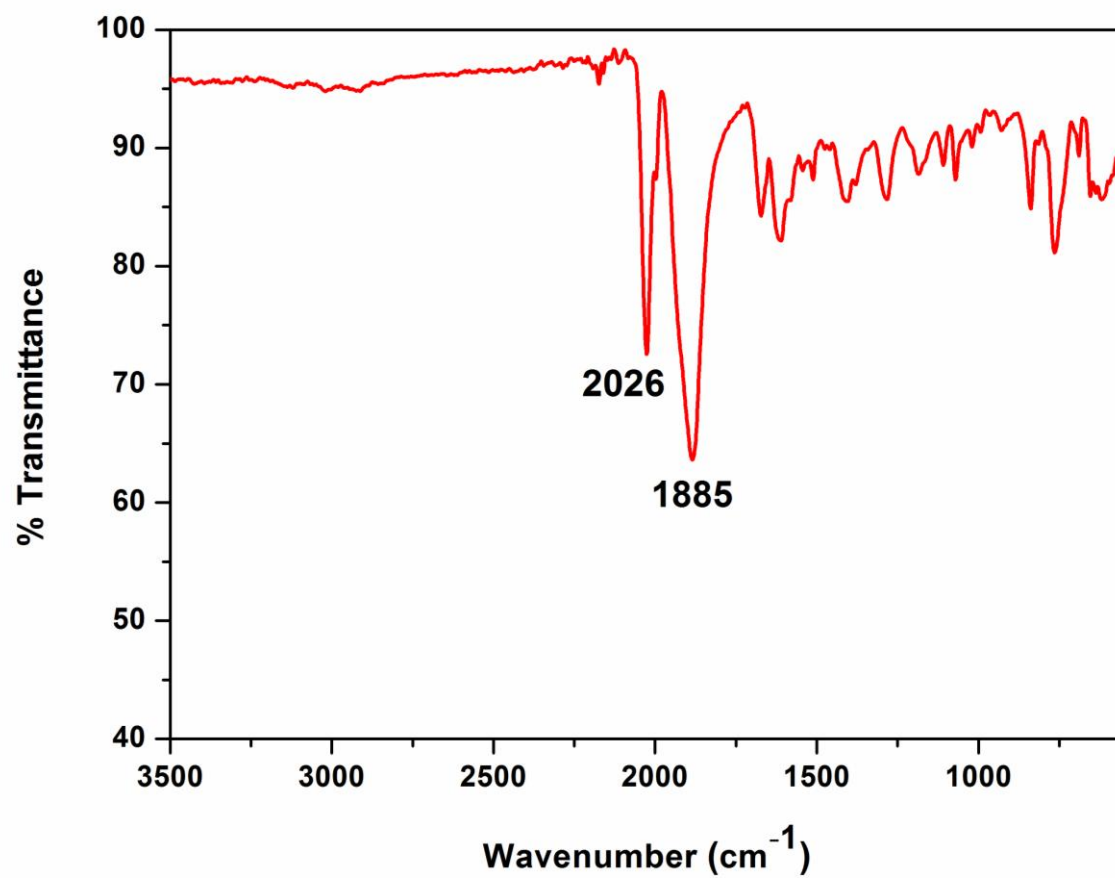

Figure S9. ATR-IR spectrum of **2**.

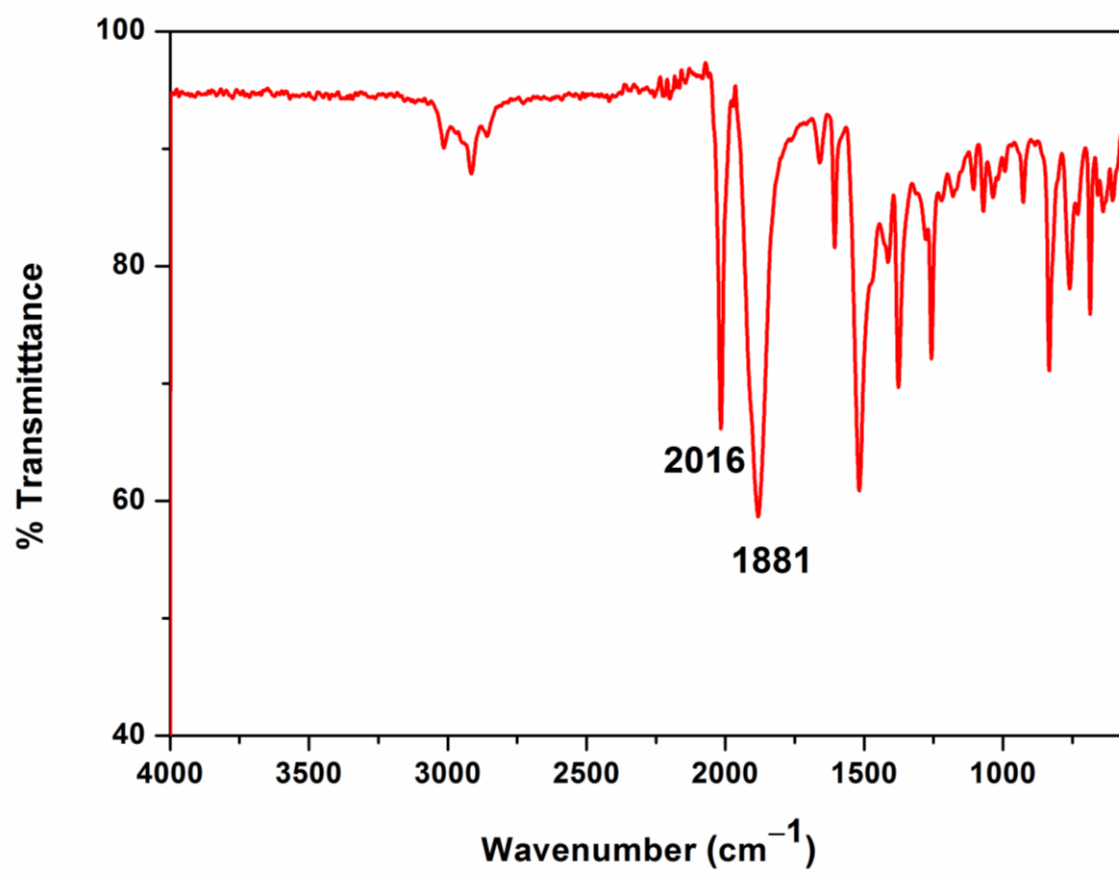

Figure S10. ATR-IR spectrum of **3**.

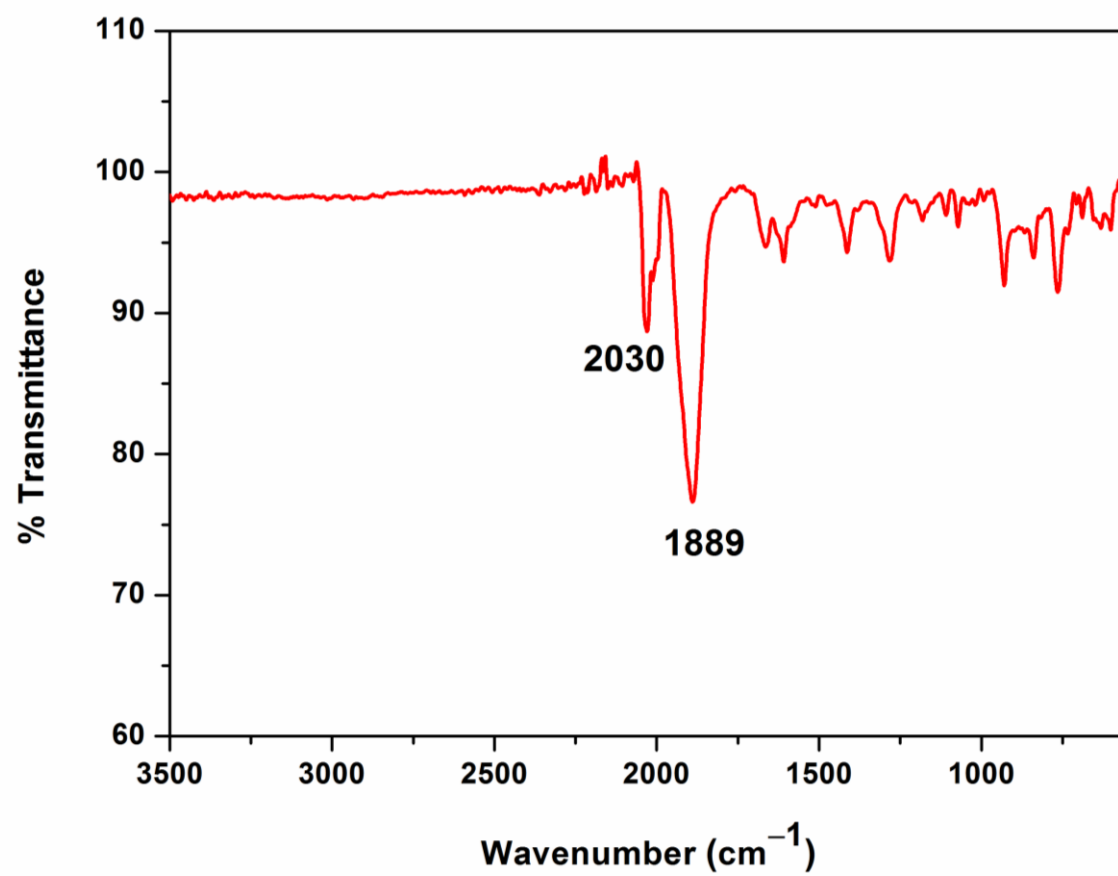

**Figure S11.** ATR-IR spectrum of **4**.

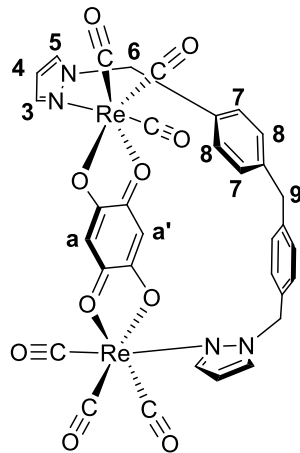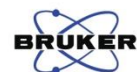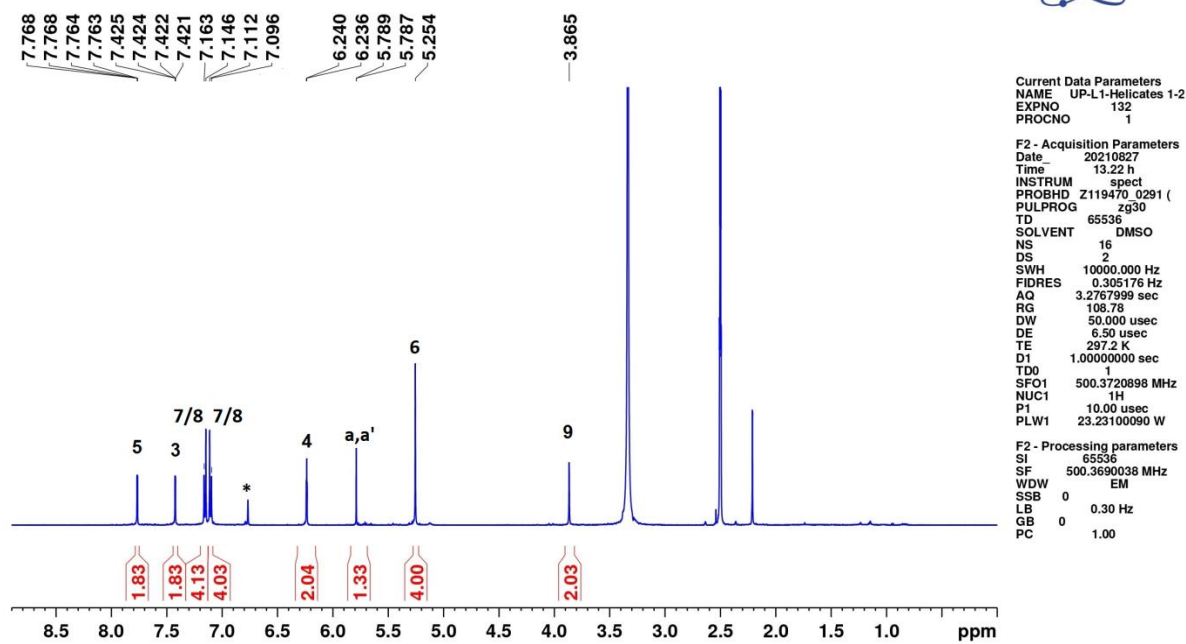

Figure S12.  $^1\text{H}$  NMR spectrum of **1** in  $\text{DMSO}-d_6$  (\* = Mesitylene).

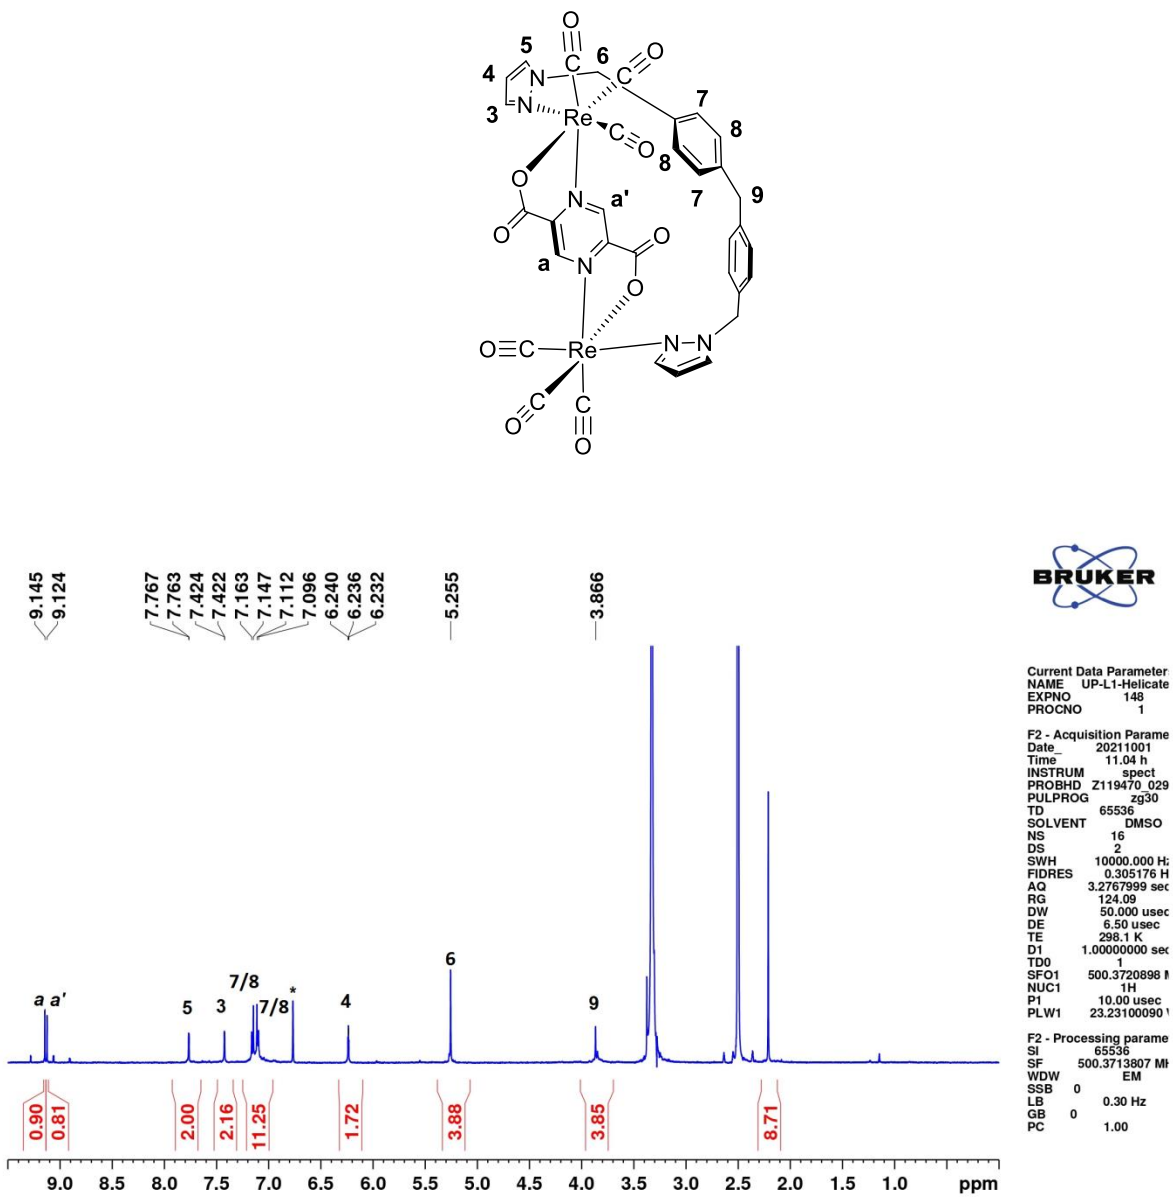

**Figure S13.**  $^1\text{H}$  NMR spectrum of **2** in  $\text{DMSO}-d_6$  (\* = Mesitylene).



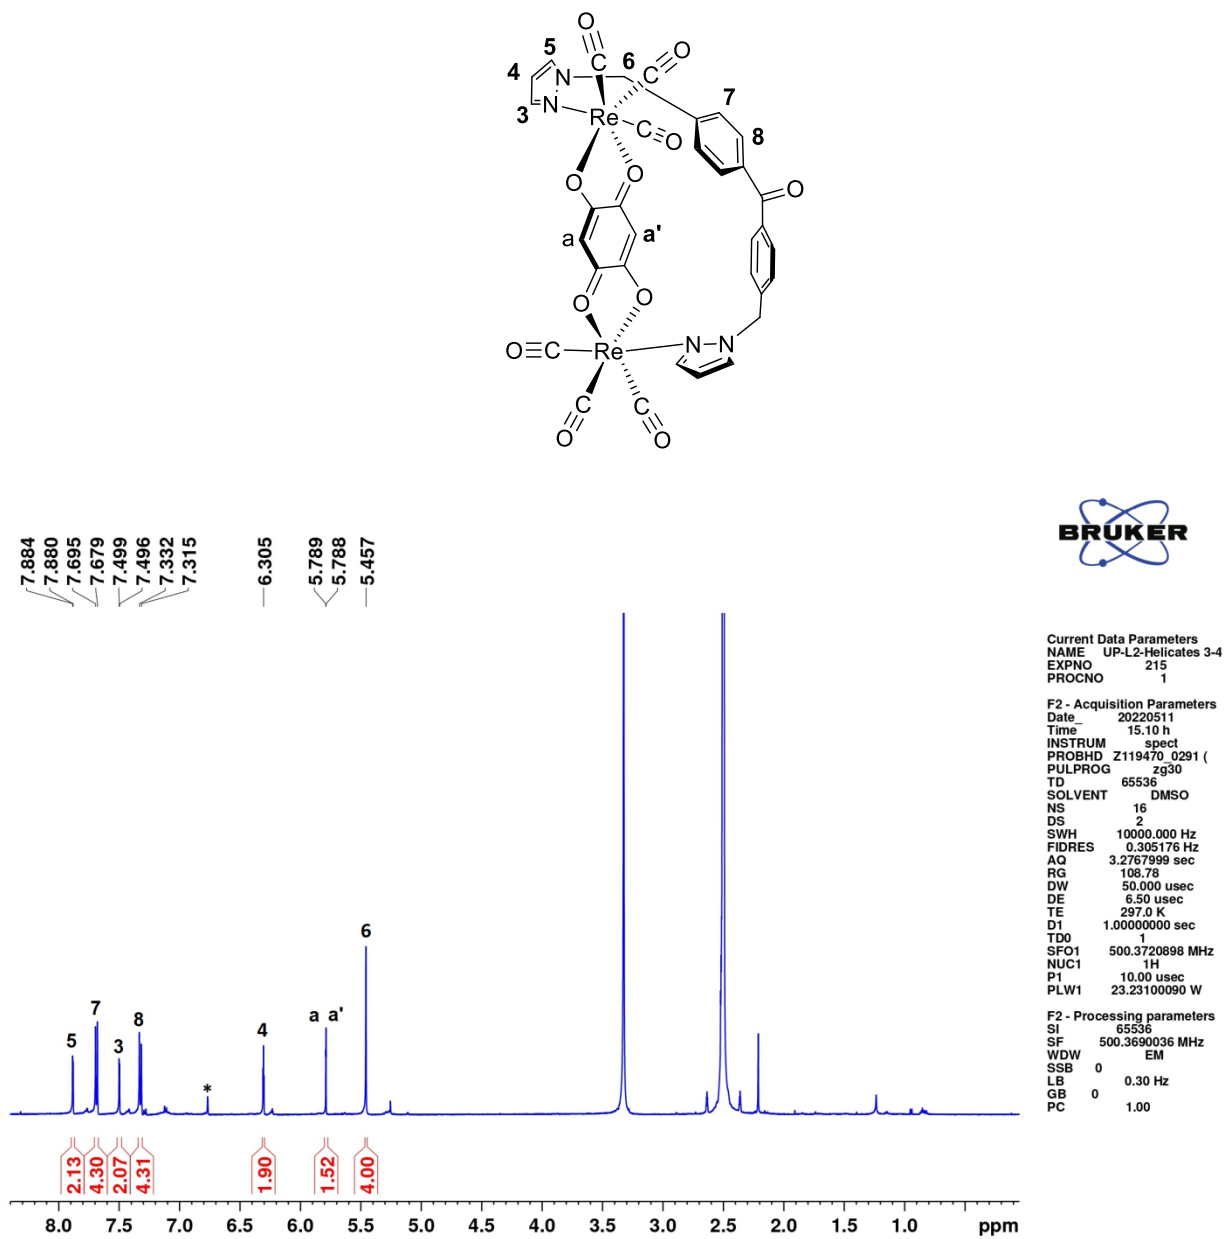

**Figure S14.**  $^1\text{H}$  NMR spectrum of **3** in  $\text{DMSO}-d_6$  (\* = Mesitylene).

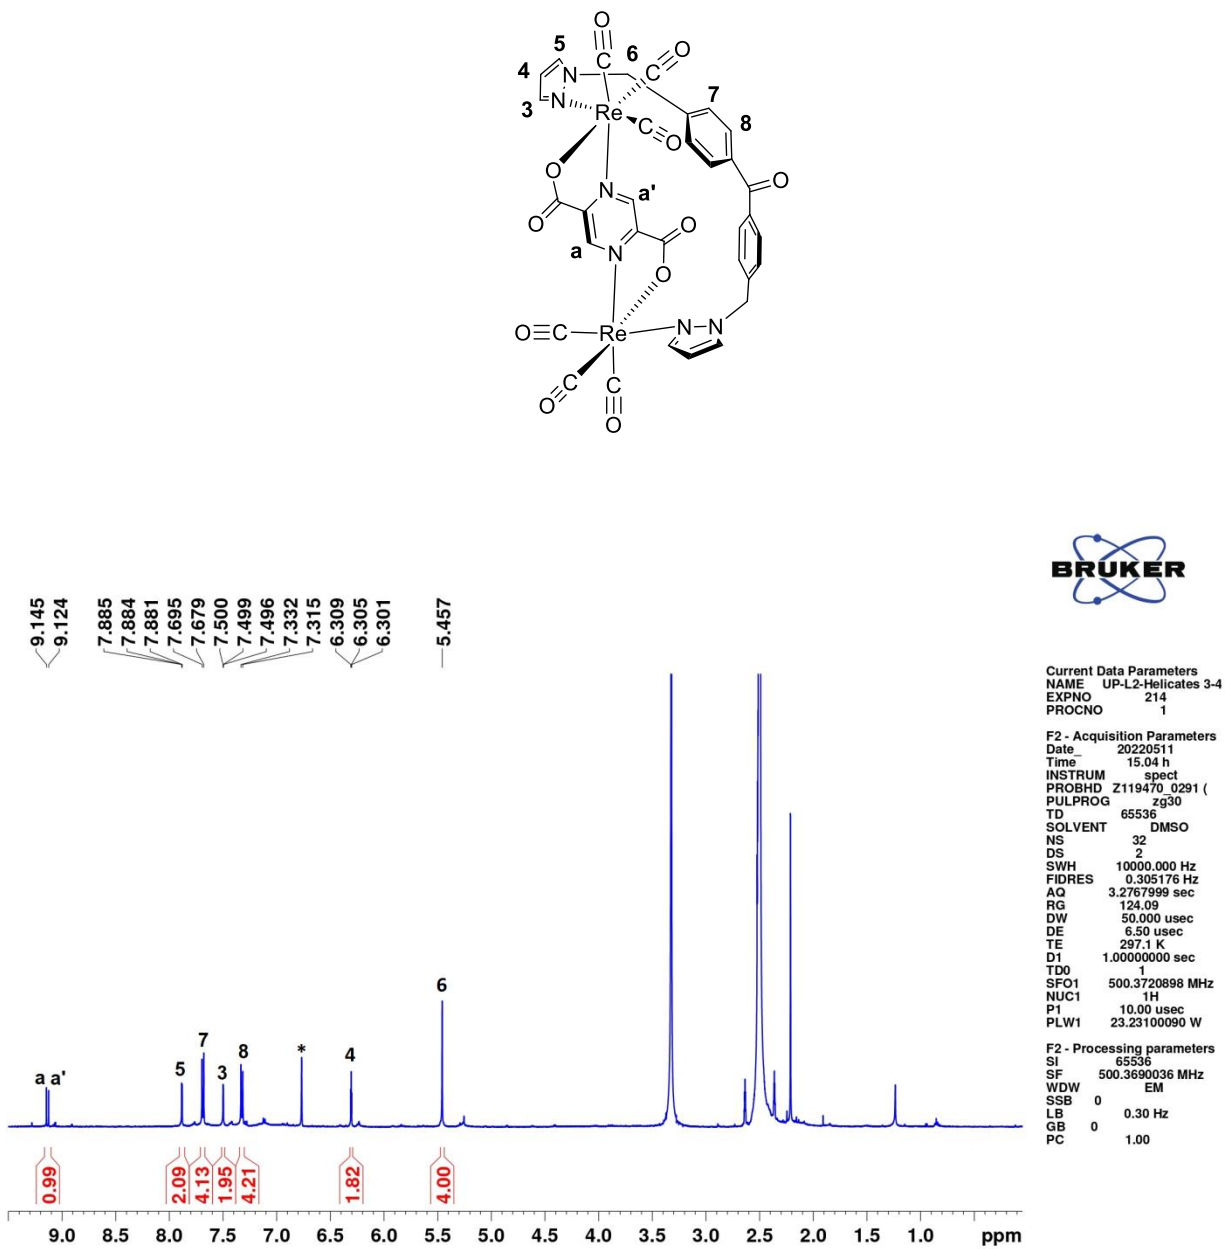

**Figure S15.**  $^1\text{H}$  NMR spectrum of **4** in  $\text{DMSO}-d_6$  (\* = Mesitylene).

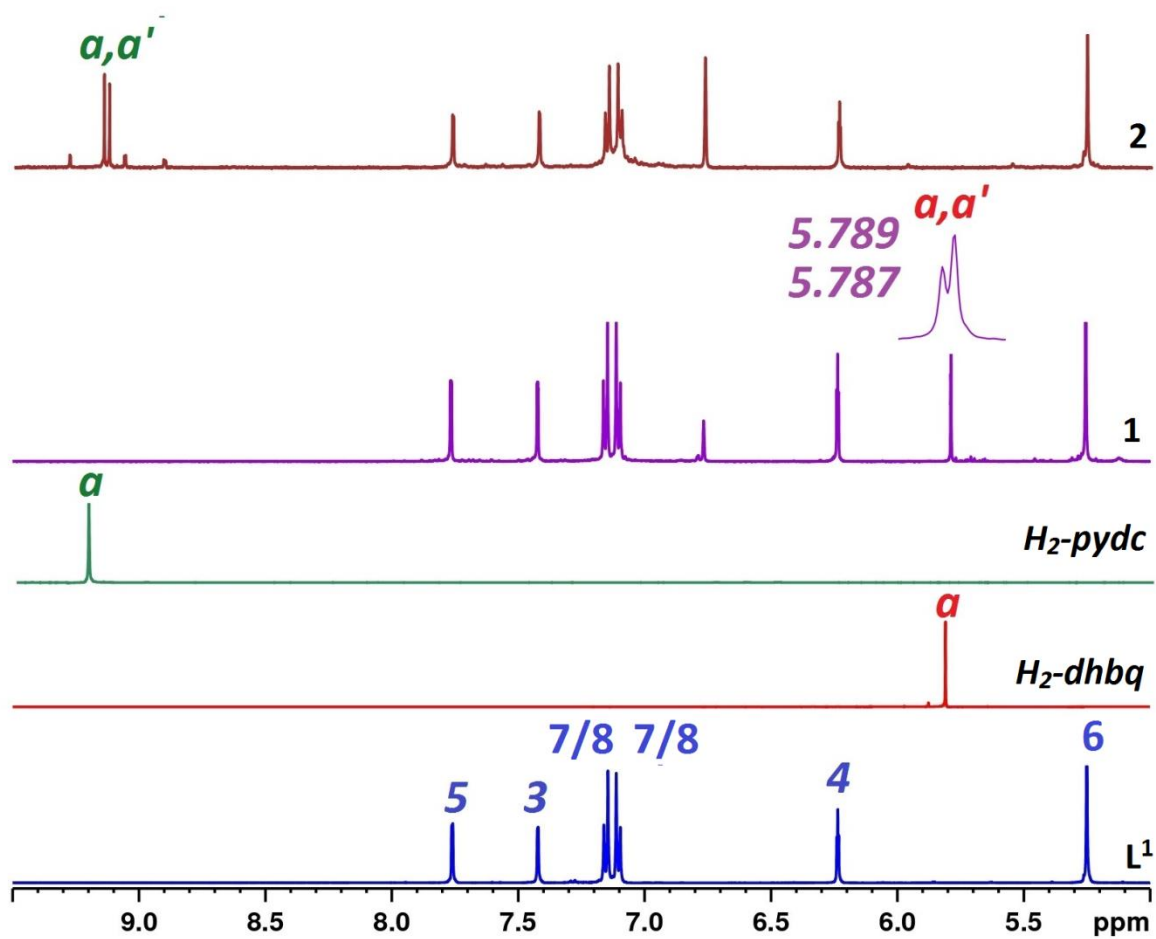

**Figure S16.** Partial  $^1\text{H}$  NMR spectra of ligands and complexes **1** and **2** in  $\text{DMSO}-d_6$ .

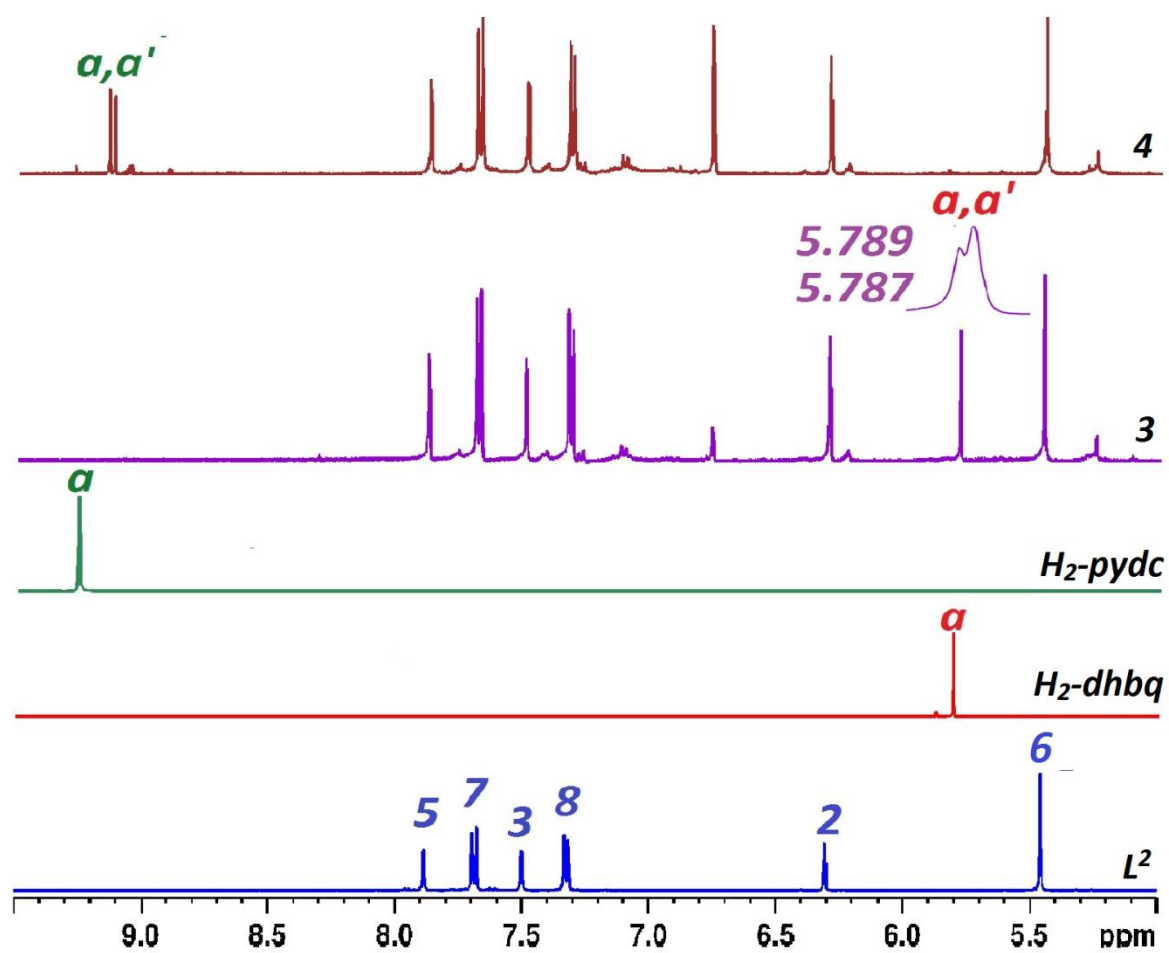

Figure S17. Partial  $^1\text{H}$  NMR spectra of ligands and complexes **3** and **4** in  $\text{DMSO}-d_6$ .

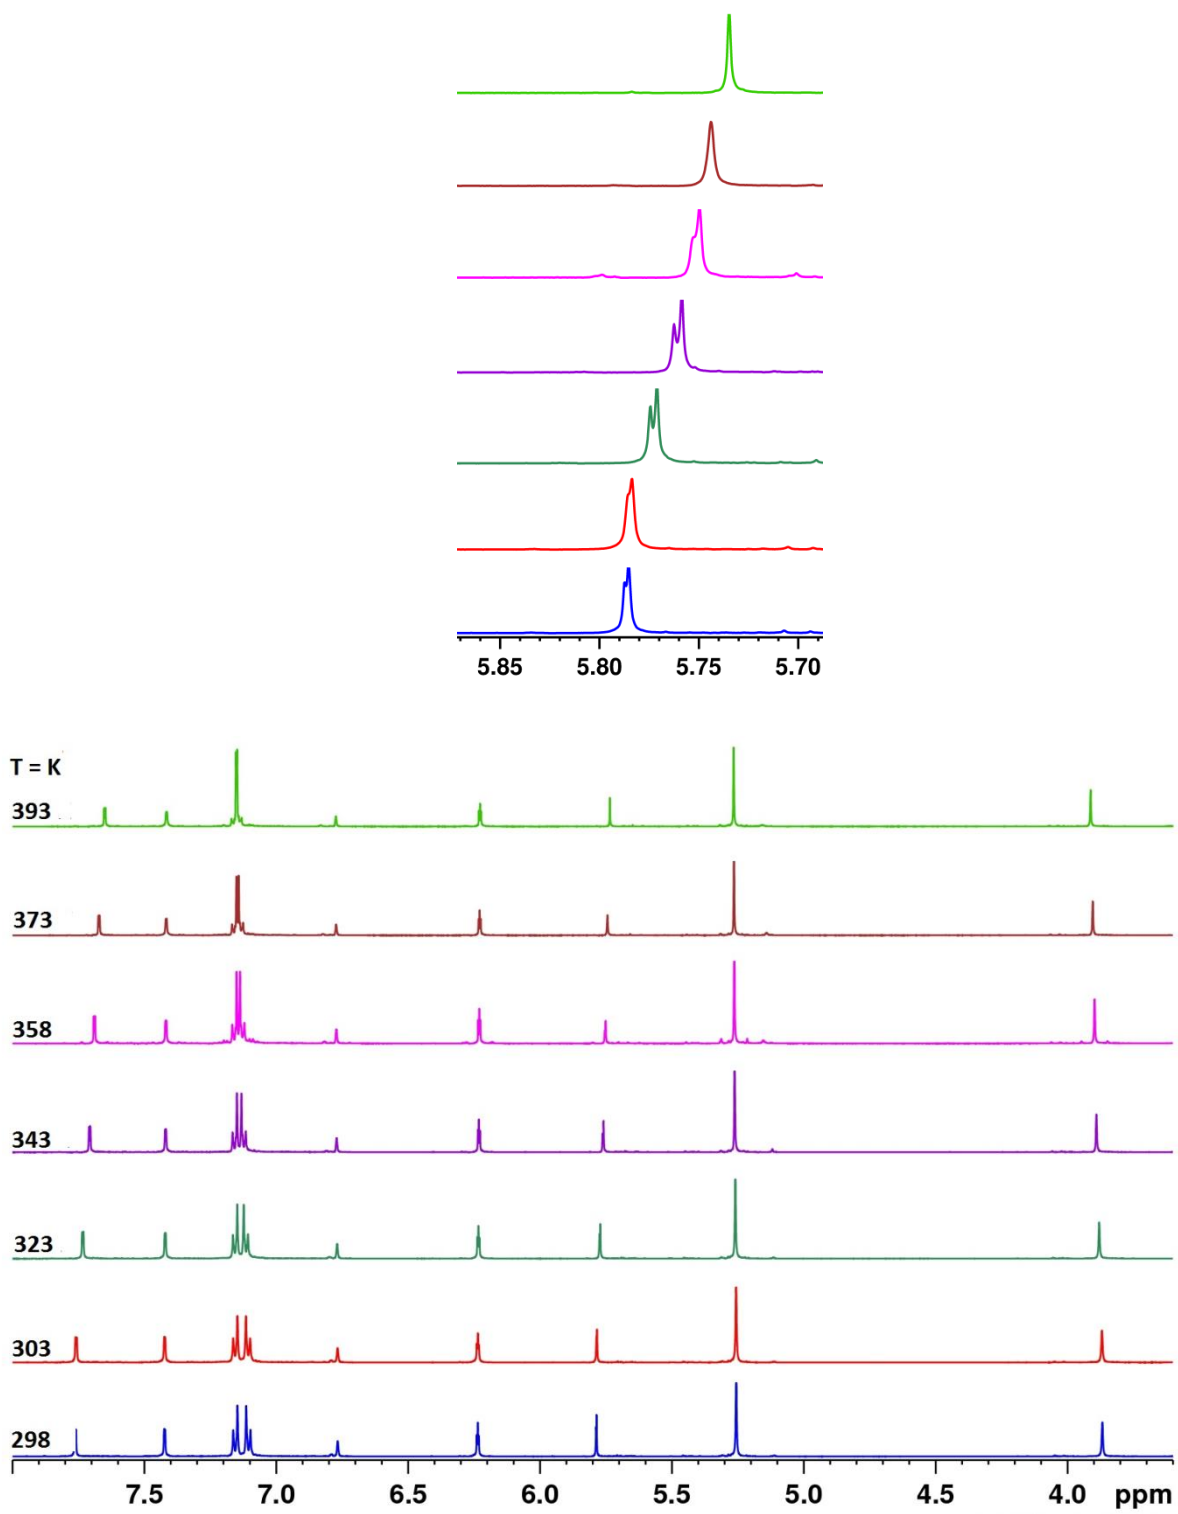

**Figure S18.** Partial variable temperature  $^1\text{H}$  NMR spectrum of **1** in  $\text{DMSO}-d_6$ .

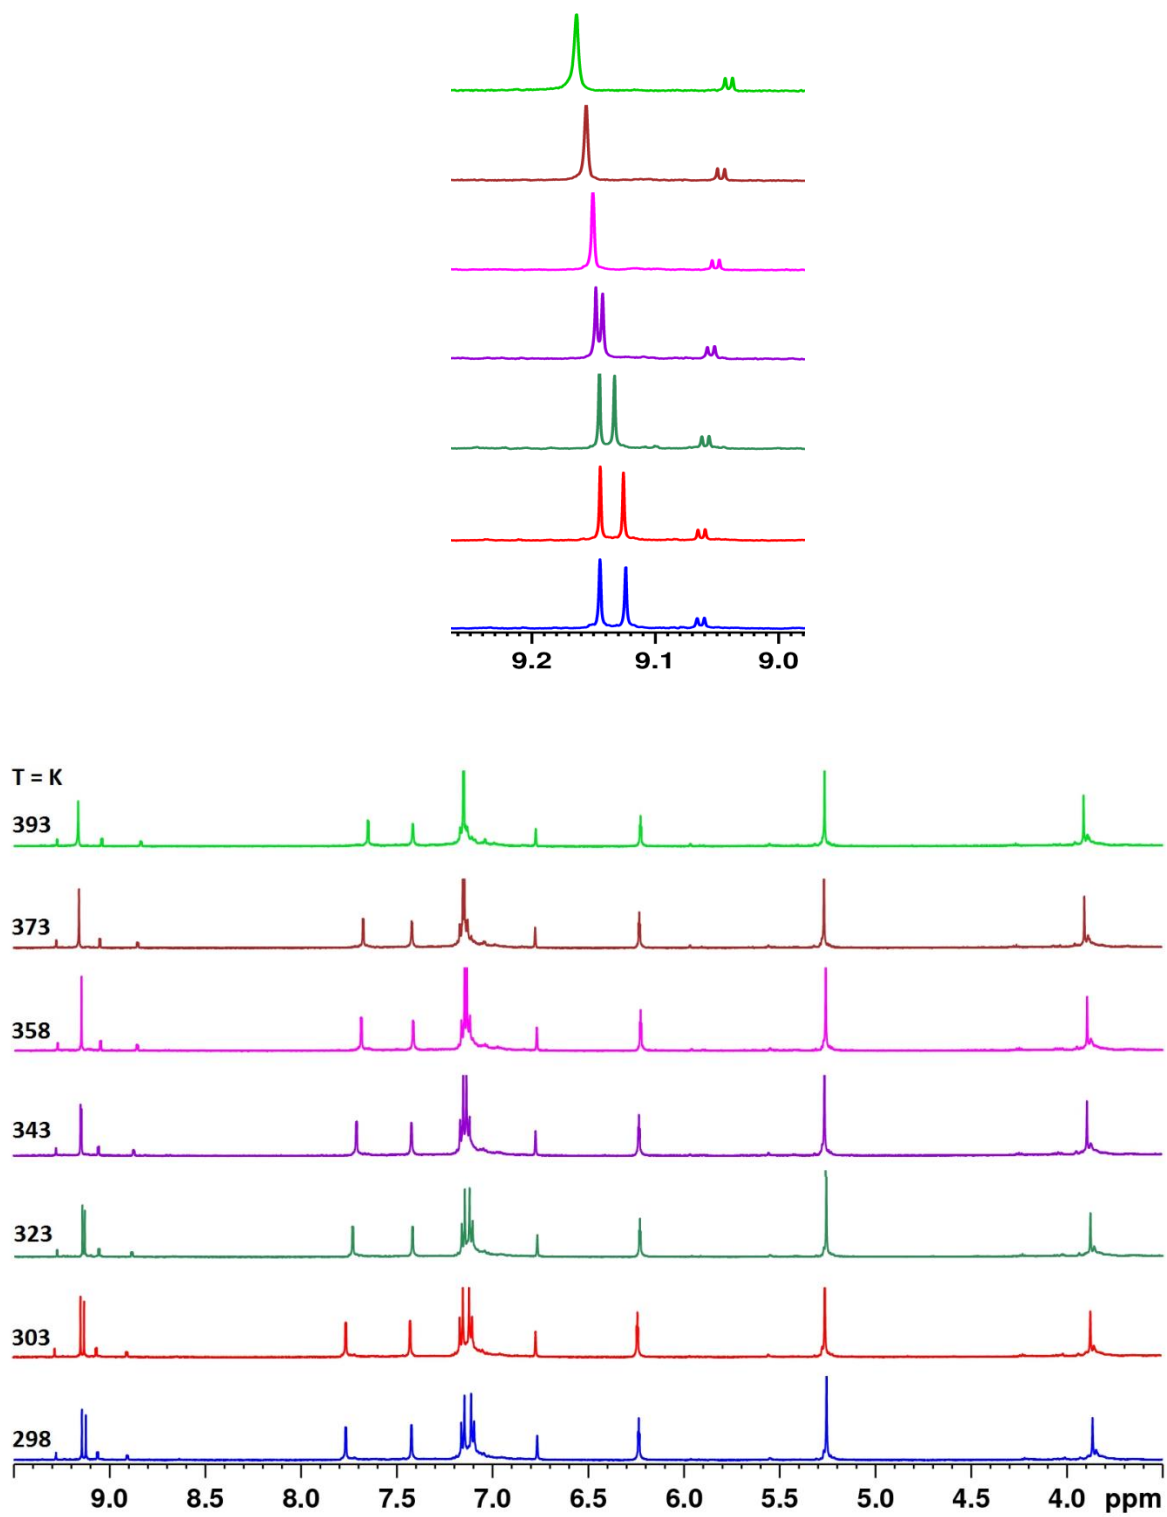

**Figure S19.** Partial variable temperature  $^1\text{H}$  NMR spectrum of **2** in  $\text{DMSO}-d_6$ .

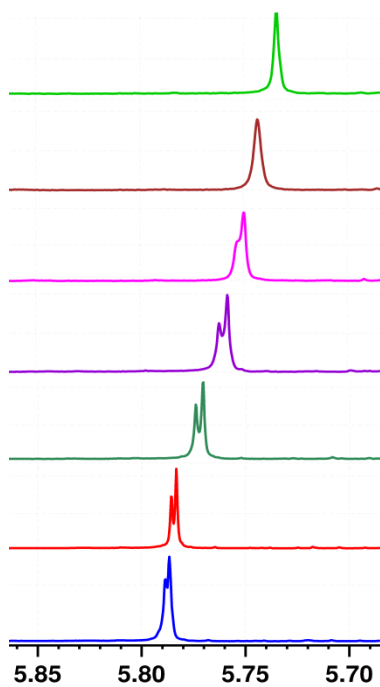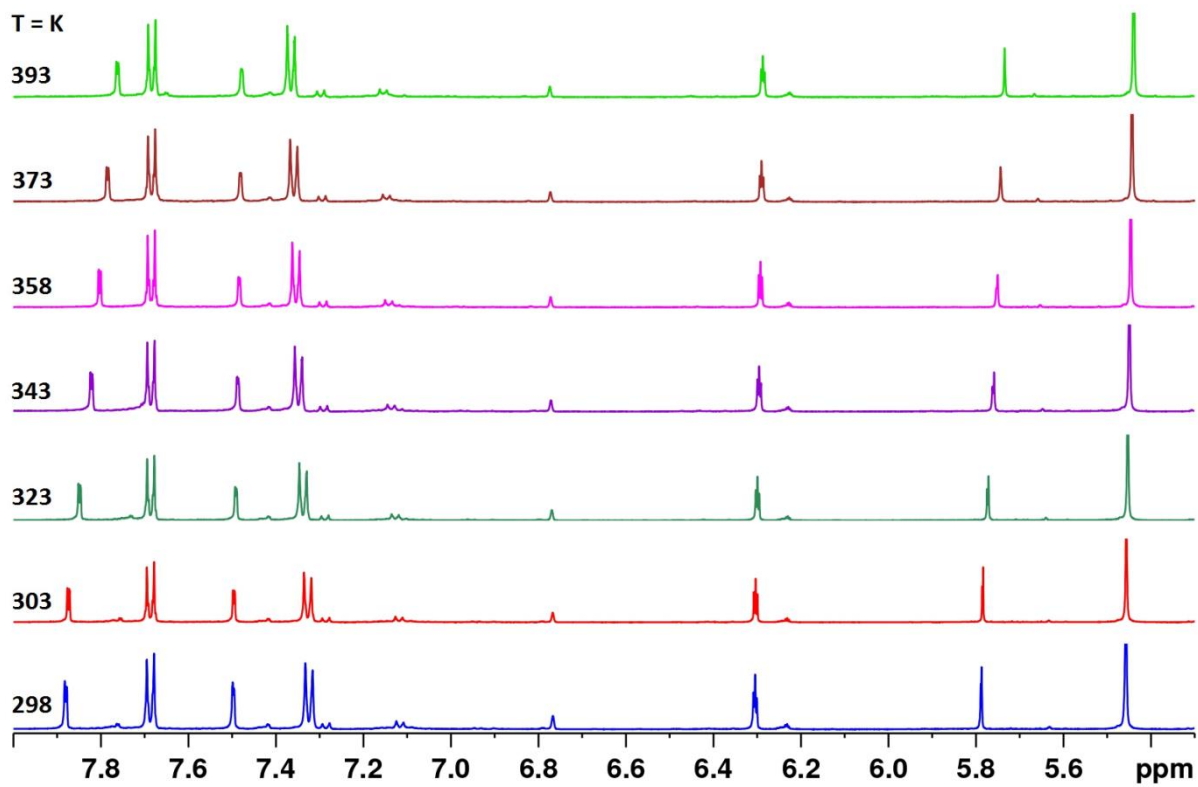

**Figure S20.** Partial variable temperature  $^1\text{H}$  NMR spectrum of **3** in  $\text{DMSO}-d_6$ .

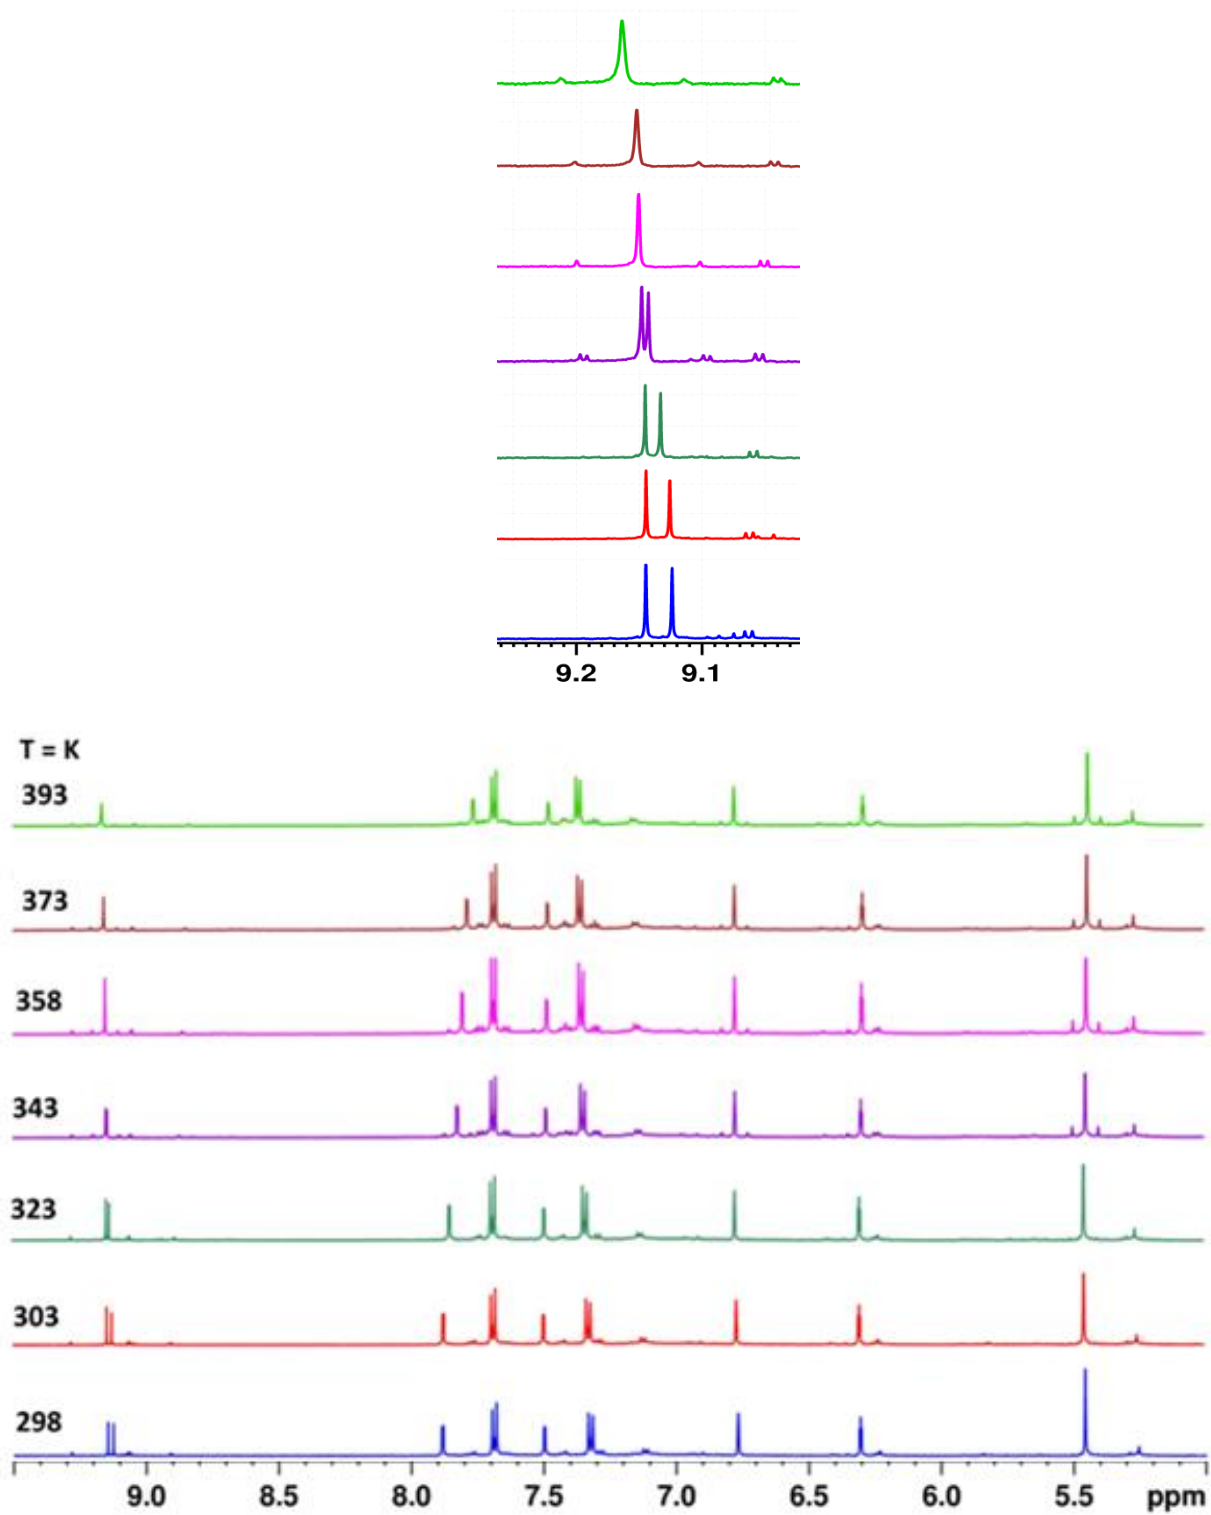

**Figure S21.** Partial variable temperature  $^1\text{H}$  NMR spectrum of **4** in  $\text{DMSO}-d_6$ .



Acquisition Parameter

|             |            |                      |          |                  |           |
|-------------|------------|----------------------|----------|------------------|-----------|
| Source Type | ESI        | Ion Polarity         | Positive | Set Nebulizer    | 0.3 Bar   |
| Focus       | Not active | Set Capillary        | 4500 V   | Set Dry Heater   | 180 °C    |
| Scan Begin  | 50 m/z     | Set End Plate Offset | -500 V   | Set Dry Gas      | 4.0 l/min |
| Scan End    | 1500 m/z   | Set Charging Voltage | 0 V      | Set Divert Valve | Waste     |
|             |            | Set Corona           | 0 nA     | Set APCI Heater  | 0 °C      |

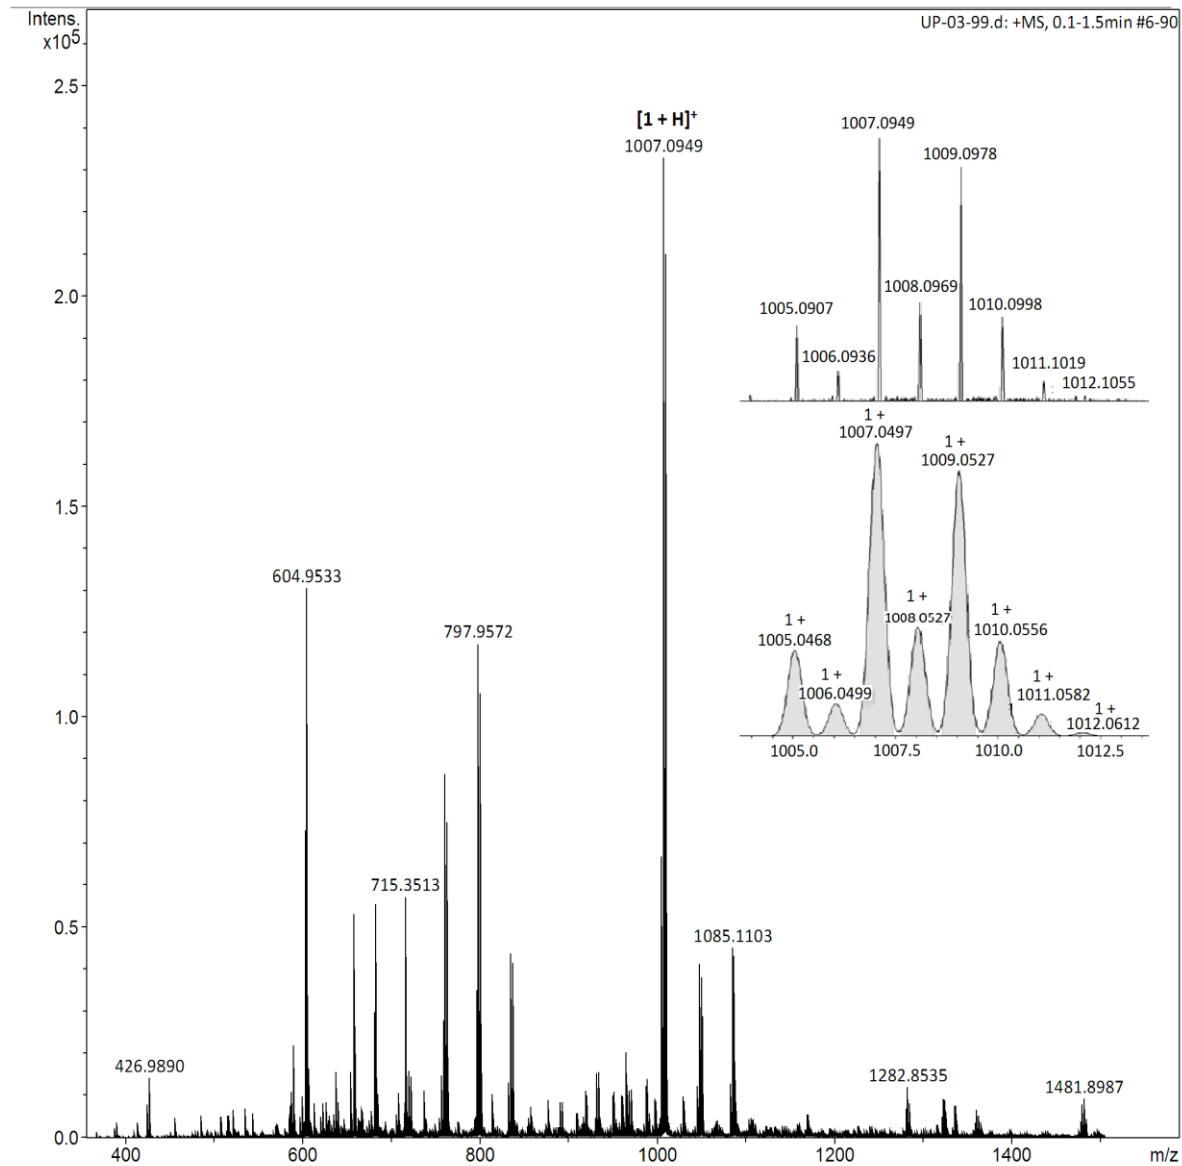

Figure S22. ESI mass spectrum of **1** in positive ion mode (simulated pattern in inset).

**Acquisition Parameter**

|             |            |                      |          |                  |           |
|-------------|------------|----------------------|----------|------------------|-----------|
| Source Type | ESI        | Ion Polarity         | Positive | Set Nebulizer    | 0.3 Bar   |
| Focus       | Not active | Set Capillary        | 4500 V   | Set Dry Heater   | 180 °C    |
| Scan Begin  | 300 m/z    | Set End Plate Offset | -500 V   | Set Dry Gas      | 4.0 l/min |
| Scan End    | 2900 m/z   | Set Charging Voltage | 0 V      | Set Divert Valve | Waste     |
|             |            | Set Corona           | 0 nA     | Set APCI Heater  | 0 °C      |

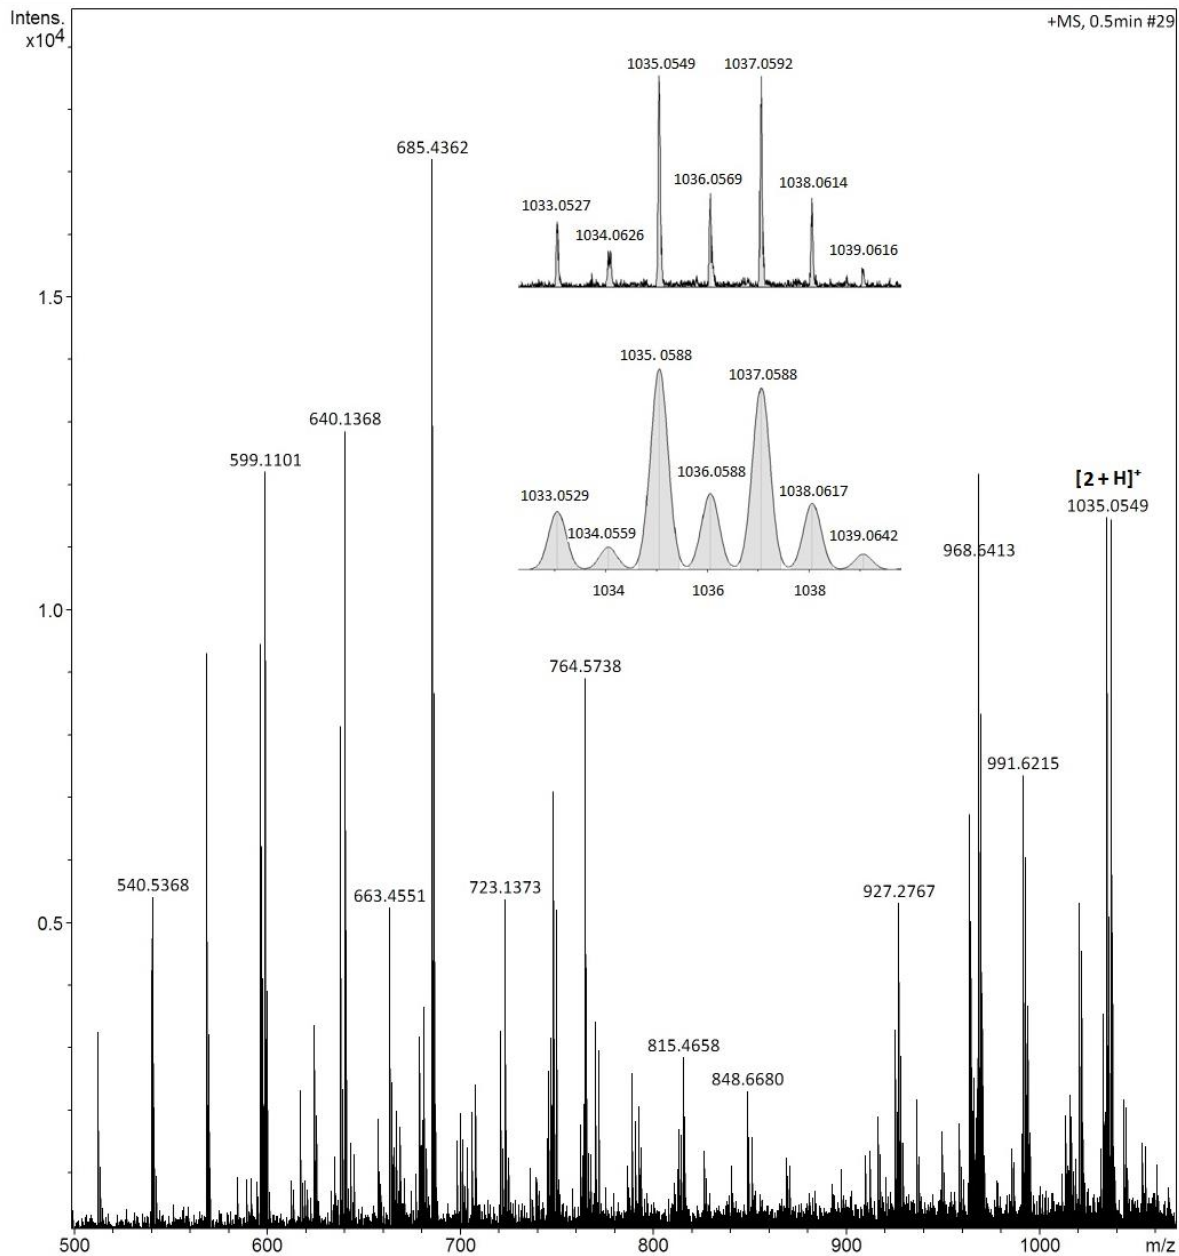

**Figure S23.** ESI mass spectrum of **2** in positive ion mode (simulated pattern in inset).

**Acquisition Parameter**

|             |            |                      |          |                  |           |
|-------------|------------|----------------------|----------|------------------|-----------|
| Source Type | ESI        | Ion Polarity         | Positive | Set Nebulizer    | 0.3 Bar   |
| Focus       | Not active | Set Capillary        | 3800 V   | Set Dry Heater   | 180 °C    |
| Scan Begin  | 200 m/z    | Set End Plate Offset | -500 V   | Set Dry Gas      | 4.0 l/min |
| Scan End    | 3000 m/z   | Set Charging Voltage | 0 V      | Set Divert Valve | Source    |
|             |            | Set Corona           | 0 nA     | Set APCI Heater  | 0 °C      |

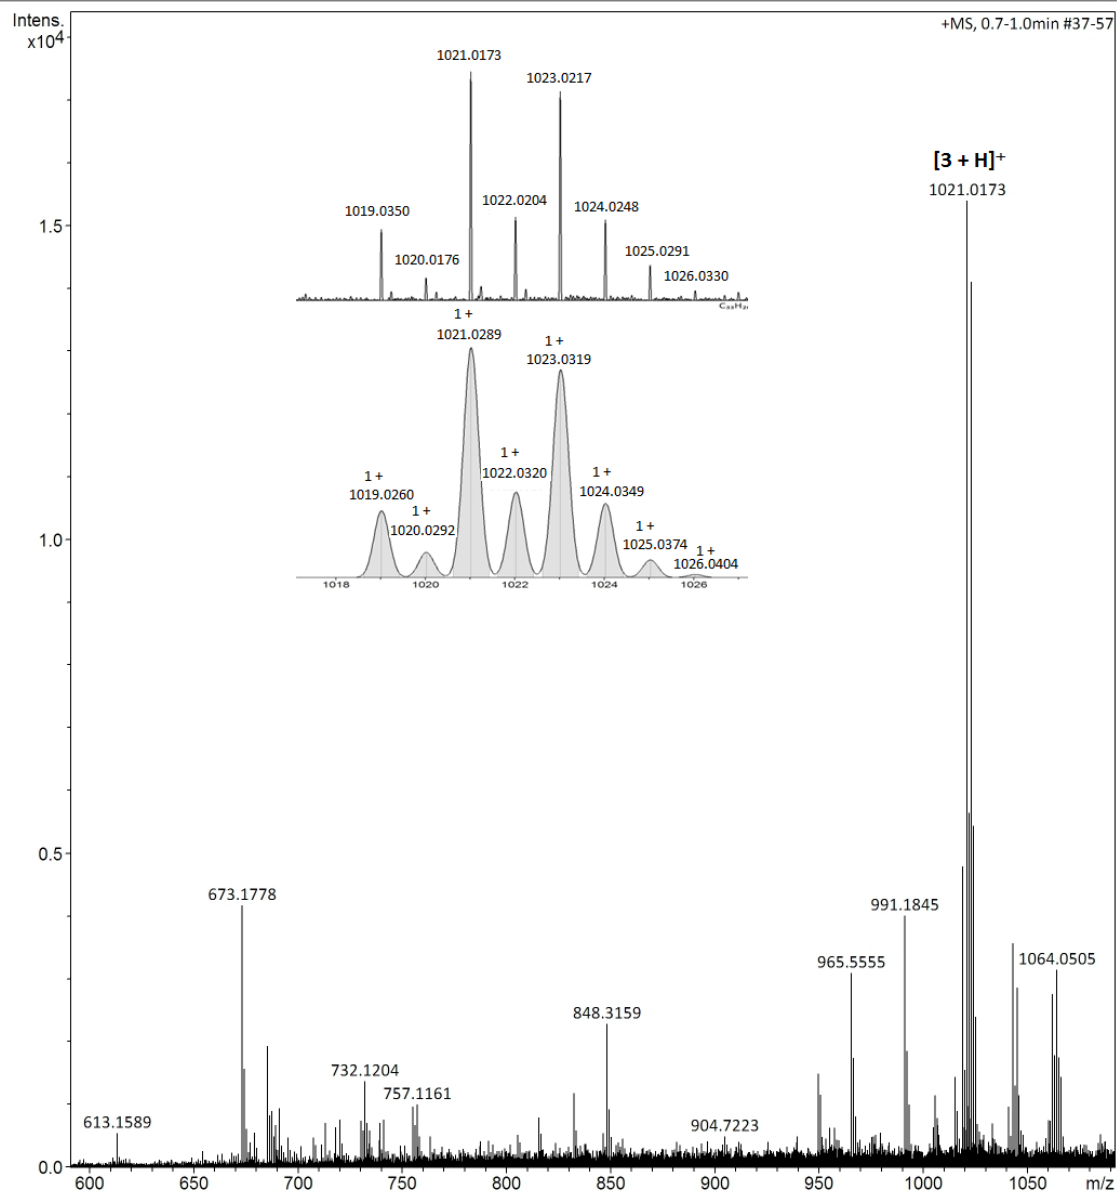

**Figure S24.** ESI mass spectrum of **3** in positive ion mode (simulated pattern in inset).

**Acquisition Parameter**

|             |            |                      |          |                  |           |
|-------------|------------|----------------------|----------|------------------|-----------|
| Source Type | ESI        | Ion Polarity         | Positive | Set Nebulizer    | 0.3 Bar   |
| Focus       | Not active | Set Capillary        | 3800 V   | Set Dry Heater   | 180 °C    |
| Scan Begin  | 200 m/z    | Set End Plate Offset | -500 V   | Set Dry Gas      | 4.0 l/min |
| Scan End    | 3000 m/z   | Set Charging Voltage | 0 V      | Set Divert Valve | Source    |
|             |            | Set Corona           | 0 nA     | Set APCI Heater  | 0 °C      |

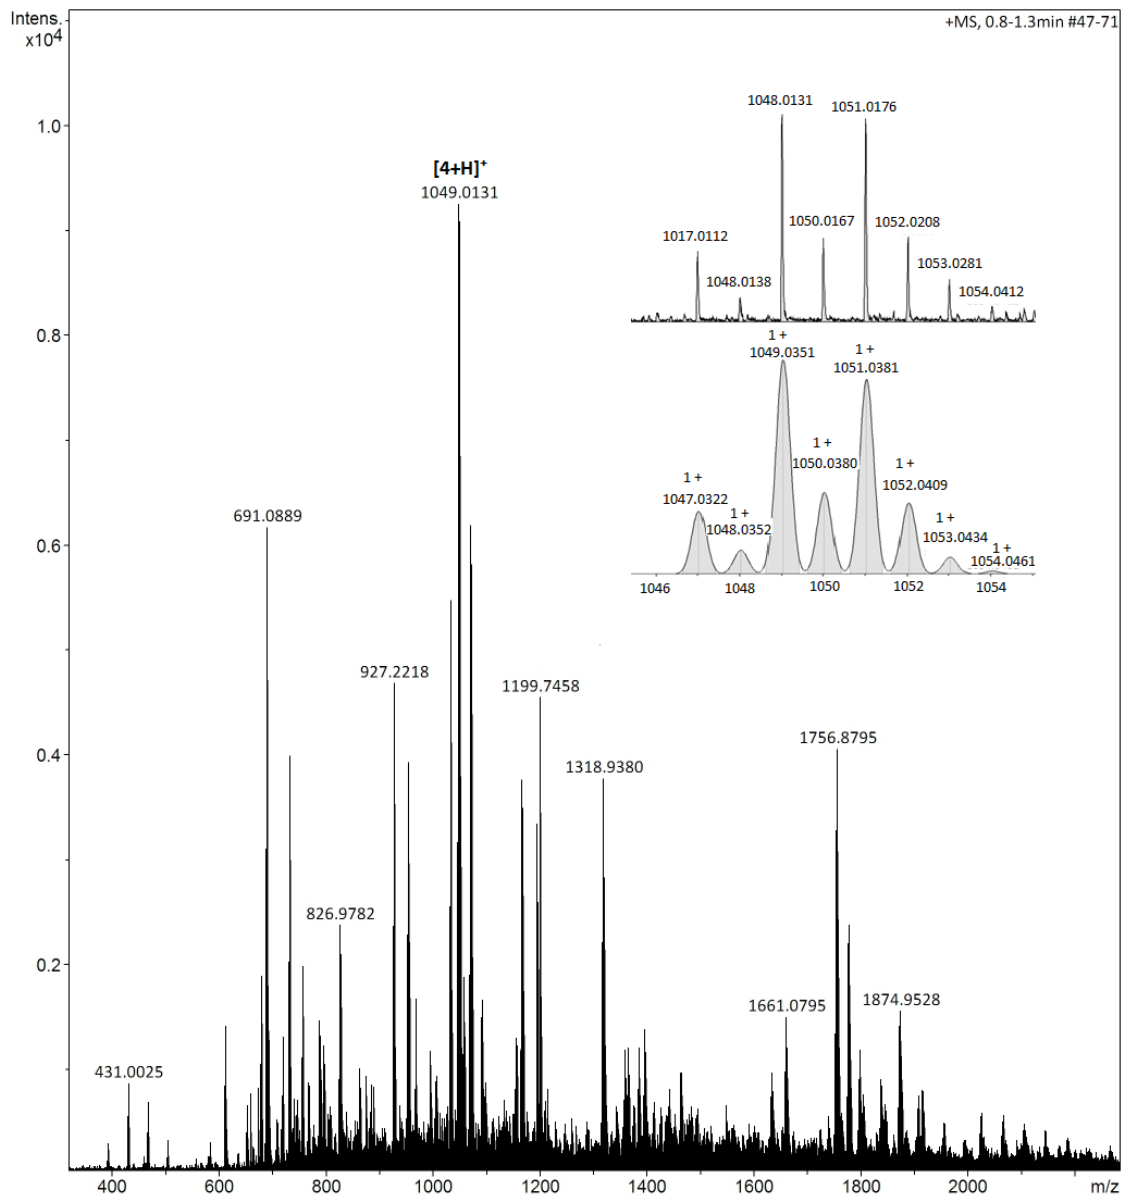

**Figure S25.** ESI mass spectrum of **4** in positive ion mode (simulated pattern in inset).

### Cartesian coordinates of the optimized structure of 1 (Helicate)

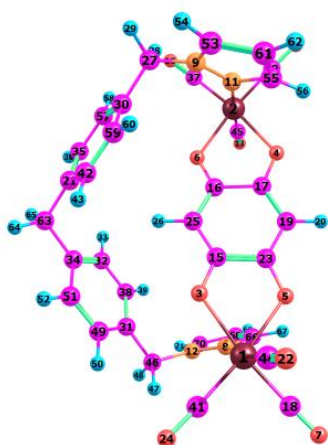

| Atom | X            | Y            | Z            |
|------|--------------|--------------|--------------|
| 75   | 4.049997000  | -0.948333000 | -0.652499000 |
| 75   | -4.050004000 | -0.948346000 | 0.652482000  |
| 8    | 2.271848000  | 0.304894000  | -0.590022000 |
| 8    | -2.340132000 | -2.287151000 | 0.274182000  |
| 8    | 2.340174000  | -2.287125000 | -0.274047000 |
| 8    | -2.271880000 | 0.304876000  | 0.589985000  |
| 8    | 6.254712000  | -3.083690000 | -0.333499000 |
| 7    | 3.923735000  | -0.649694000 | 1.601805000  |
| 7    | -4.113606000 | 0.443108000  | -2.392017000 |
| 8    | -6.143080000 | 1.225843000  | 1.259262000  |
| 7    | -3.923523000 | -0.649543000 | -1.601841000 |
| 7    | 4.113764000  | 0.443028000  | 2.391923000  |
| 8    | -3.881748000 | -1.520182000 | 3.684389000  |
| 8    | -6.254742000 | -3.083638000 | 0.333204000  |
| 6    | 1.167710000  | -0.237109000 | -0.272337000 |
| 6    | -1.167717000 | -0.237113000 | 0.272353000  |
| 6    | -1.189468000 | -1.755916000 | 0.171036000  |
| 6    | 5.452627000  | -2.266305000 | -0.471477000 |
| 6    | 0.000033000  | -2.465037000 | 0.000170000  |
| 1    | 0.000044000  | -3.548419000 | 0.000261000  |
| 6    | -1.164076000 | 4.267928000  | -0.509608000 |
| 8    | 3.881158000  | -1.519734000 | -3.684464000 |
| 6    | 1.189506000  | -1.755912000 | -0.170869000 |
| 8    | 6.143118000  | 1.225781000  | -1.259376000 |
| 6    | -0.000017000 | 0.468549000  | -0.000027000 |
| 1    | -0.000019000 | 1.548996000  | -0.000049000 |
| 6    | -4.447206000 | 1.782489000  | -1.891500000 |
| 1    | -5.189342000 | 1.672644000  | -1.105195000 |
| 1    | -4.951830000 | 2.277523000  | -2.725706000 |
| 6    | -3.277465000 | 2.622117000  | -1.410916000 |
| 6    | 3.277477000  | 2.622027000  | 1.410928000  |
| 6    | 1.063579000  | 3.557625000  | 1.712369000  |
| 1    | 0.152867000  | 3.623263000  | 2.300203000  |
| 6    | 1.164025000  | 4.267918000  | 0.509886000  |
| 6    | -2.349479000 | 4.155347000  | 0.218681000  |
| 1    | -2.461356000 | 4.698966000  | 1.152288000  |
| 6    | -5.374625000 | 0.392201000  | 1.017475000  |
| 6    | 2.103985000  | 2.750936000  | 2.158990000  |
| 1    | 1.985174000  | 2.204133000  | 3.089572000  |

|   |              |              |              |
|---|--------------|--------------|--------------|
| 6 | -5.452648000 | -2.266278000 | 0.471266000  |
| 6 | 5.374614000  | 0.392195000  | -1.017545000 |
| 6 | -1.063554000 | 3.557745000  | -1.712157000 |
| 1 | -0.152809000 | 3.623450000  | -2.299934000 |
| 6 | 3.951256000  | -1.307070000 | -2.555650000 |
| 6 | -3.951565000 | -1.307315000 | 2.555597000  |
| 6 | 4.447290000  | 1.782381000  | 1.891304000  |
| 1 | 5.189216000  | 1.672460000  | 1.104820000  |
| 1 | 4.952144000  | 2.277437000  | 2.725360000  |
| 6 | 3.390482000  | 3.340726000  | 0.221903000  |
| 1 | 4.289857000  | 3.254047000  | -0.379294000 |
| 6 | 2.349394000  | 4.155414000  | -0.218483000 |
| 1 | 2.461195000  | 4.699109000  | -1.152056000 |
| 6 | -3.945274000 | 0.116240000  | -3.694719000 |
| 1 | -4.066726000 | 0.859823000  | -4.466697000 |
| 6 | -3.632370000 | -1.656404000 | -2.435281000 |
| 1 | -3.434501000 | -2.636740000 | -2.031975000 |
| 6 | -3.390538000 | 3.340691000  | -0.221841000 |
| 1 | -4.289943000 | 3.253954000  | 0.379296000  |
| 6 | -2.103931000 | 2.751102000  | -2.158905000 |
| 1 | -1.985092000 | 2.204389000  | -3.089535000 |
| 6 | -3.632321000 | -1.225630000 | -3.765799000 |
| 1 | -3.438790000 | -1.810419000 | -4.650172000 |
| 6 | -0.000047000 | 5.104752000  | 0.000201000  |
| 1 | 0.355830000  | 5.761230000  | -0.799821000 |
| 1 | -0.355963000 | 5.761093000  | 0.800318000  |
| 6 | 3.632636000  | -1.656512000 | 2.435307000  |
| 1 | 3.434806000  | -2.636883000 | 2.032064000  |
| 6 | 3.632543000  | -1.225653000 | 3.765801000  |
| 1 | 3.439068000  | -1.810409000 | 4.650207000  |
| 6 | 3.945437000  | 0.116229000  | 3.694639000  |
| 1 | 4.066857000  | 0.859858000  | 4.466580000  |

### Cartesian coordinates of the optimized structure of 1(Mesocate)

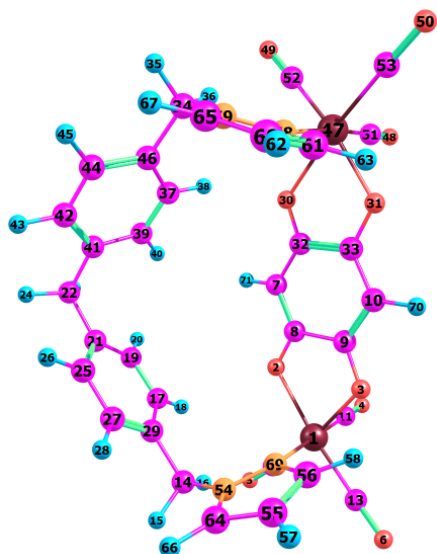

| Atom | X            | Y            | Z            |
|------|--------------|--------------|--------------|
| 75   | -4.030786000 | -1.386328000 | -0.235679000 |
| 8    | -2.271862000 | -0.412924000 | -1.110486000 |
| 8    | -2.268982000 | -2.189512000 | 0.802403000  |
| 8    | -3.972951000 | -3.648497000 | -2.337216000 |
| 8    | -6.181875000 | 0.009192000  | -1.939723000 |
| 8    | -6.176793000 | -2.915480000 | 1.367472000  |
| 6    | 0.079426000  | -0.328801000 | -1.256626000 |
| 6    | -1.123918000 | -0.785430000 | -0.718185000 |
| 6    | -1.119827000 | -1.808060000 | 0.411442000  |
| 6    | 0.083047000  | -2.258171000 | 0.950970000  |
| 6    | -3.997766000 | -2.801577000 | -1.559407000 |
| 6    | -5.394844000 | -0.522211000 | -1.276171000 |
| 6    | -5.395546000 | -2.336183000 | 0.747629000  |
| 6    | -4.762606000 | 2.272194000  | 0.530059000  |
| 1    | -5.534626000 | 2.932518000  | 0.932728000  |
| 1    | -5.236502000 | 1.664078000  | -0.233882000 |
| 6    | -3.242992000 | 2.912333000  | -1.384959000 |
| 1    | -3.755000000 | 2.184783000  | -2.005103000 |
| 6    | -2.203923000 | 3.666026000  | -1.928682000 |
| 1    | -1.932928000 | 3.518114000  | -2.969792000 |
| 6    | -1.500674000 | 4.589225000  | -1.153619000 |
| 6    | -0.293286000 | 5.329075000  | -1.705230000 |
| 1    | -0.351570000 | 5.360976000  | -2.797341000 |
| 1    | -0.301541000 | 6.367123000  | -1.360465000 |
| 6    | -1.892361000 | 4.764559000  | 0.178588000  |
| 1    | -1.367960000 | 5.482489000  | 0.802472000  |
| 6    | -2.937787000 | 4.027271000  | 0.718020000  |
| 1    | -3.218172000 | 4.192102000  | 1.754252000  |
| 6    | -3.617345000 | 3.077469000  | -0.052571000 |
| 8    | 2.433085000  | -0.458454000 | -1.160280000 |
| 8    | 2.434288000  | -2.126221000 | 0.843502000  |
| 6    | 1.282339000  | -0.798838000 | -0.736635000 |
| 6    | 1.284740000  | -1.785227000 | 0.423289000  |

|    |              |              |              |
|----|--------------|--------------|--------------|
| 6  | 4.451833000  | 2.491633000  | 0.204639000  |
| 1  | 5.267343000  | 3.157633000  | 0.494736000  |
| 1  | 4.846394000  | 1.803094000  | -0.535245000 |
| 6  | 2.474781000  | 2.729119000  | -1.348839000 |
| 1  | 2.701728000  | 1.747661000  | -1.747279000 |
| 6  | 1.356577000  | 3.414230000  | -1.805557000 |
| 1  | 0.736183000  | 2.962170000  | -2.573106000 |
| 6  | 1.002126000  | 4.658806000  | -1.276710000 |
| 6  | 1.835810000  | 5.224093000  | -0.309046000 |
| 1  | 1.602611000  | 6.204057000  | 0.097564000  |
| 6  | 2.963065000  | 4.543218000  | 0.147608000  |
| 1  | 3.597472000  | 5.011313000  | 0.895955000  |
| 6  | 3.279051000  | 3.275586000  | -0.345208000 |
| 75 | 4.199314000  | -1.289266000 | -0.163118000 |
| 8  | 4.377903000  | -3.692901000 | -2.095537000 |
| 8  | 6.386623000  | 0.104379000  | -1.825781000 |
| 8  | 6.324120000  | -2.576238000 | 1.663459000  |
| 6  | 4.314541000  | -2.795295000 | -1.379207000 |
| 6  | 5.582096000  | -0.421878000 | -1.181437000 |
| 6  | 5.552815000  | -2.088137000 | 0.958187000  |
| 7  | -4.382173000 | 1.389881000  | 1.641534000  |
| 6  | -3.772142000 | 0.715421000  | 3.659115000  |
| 6  | -3.517545000 | -0.272164000 | 2.702602000  |
| 1  | -3.595405000 | 0.667984000  | 4.721314000  |
| 1  | -3.107272000 | -1.261152000 | 2.827989000  |
| 7  | 4.117091000  | 1.697115000  | 1.401533000  |
| 6  | 3.516427000  | 1.175295000  | 3.466029000  |
| 6  | 3.503022000  | 0.046437000  | 2.641293000  |
| 1  | 3.280942000  | 1.229488000  | 4.516447000  |
| 1  | 3.257952000  | -0.975674000 | 2.880976000  |
| 6  | -4.321436000 | 1.758115000  | 2.942018000  |
| 6  | 3.909582000  | 2.205303000  | 2.636600000  |
| 1  | -4.674864000 | 2.727559000  | 3.255750000  |
| 1  | 4.048117000  | 3.257317000  | 2.827850000  |
| 7  | 3.864849000  | 0.358597000  | 1.389457000  |
| 7  | -3.884556000 | 0.133551000  | 1.479197000  |
| 1  | 0.086591000  | -2.982466000 | 1.756562000  |
| 1  | 0.072310000  | 0.376996000  | -2.077114000 |



Cartesian coordinates of the optimized structure of 2 (Helicate)

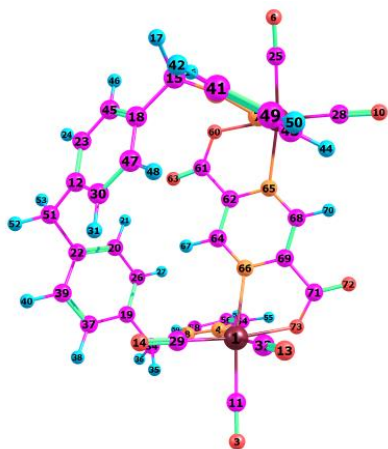

| Atom | X            | Y            | Z            |
|------|--------------|--------------|--------------|
| 75   | -3.193485000 | -1.226122000 | 0.729789000  |
| 75   | 3.806723000  | -0.826660000 | -0.597093000 |
| 8    | -6.068612000 | -1.985155000 | 1.589360000  |
| 7    | -3.878371000 | -0.862318000 | -1.417272000 |
| 7    | 3.625846000  | 1.179352000  | 2.090033000  |
| 8    | 6.748004000  | 0.136204000  | -0.531248000 |
| 7    | 3.414880000  | -0.049620000 | 1.536693000  |
| 7    | -4.551406000 | 0.175536000  | -1.996025000 |
| 8    | 4.184596000  | -1.850714000 | -3.487165000 |
| 8    | 4.622601000  | -3.593038000 | 0.505270000  |
| 6    | -4.999464000 | -1.690477000 | 1.284399000  |
| 6    | 0.289142000  | 4.704774000  | 0.333305000  |
| 8    | -2.132920000 | -2.047239000 | 3.512442000  |
| 8    | -3.464153000 | 1.551469000  | 2.035748000  |
| 6    | 3.844082000  | 2.404403000  | 1.317920000  |
| 1    | 4.299557000  | 2.120920000  | 0.371991000  |
| 1    | 4.580600000  | 2.989626000  | 1.876052000  |
| 6    | 2.589246000  | 3.222603000  | 1.049101000  |
| 6    | -4.001951000 | 2.475009000  | -1.109481000 |
| 6    | -1.836676000 | 3.483917000  | -1.516435000 |
| 1    | -0.873710000 | 3.436274000  | -2.010511000 |
| 6    | -2.074787000 | 4.459014000  | -0.541990000 |
| 6    | 1.528516000  | 4.966749000  | -0.254867000 |
| 1    | 1.604773000  | 5.719474000  | -1.033688000 |
| 6    | 5.660228000  | -0.239430000 | -0.553474000 |
| 6    | -2.787909000 | 2.505294000  | -1.796687000 |
| 1    | -2.554425000 | 1.741301000  | -2.531399000 |
| 6    | 4.343893000  | -2.552997000 | 0.084998000  |
| 6    | -3.409372000 | 0.539723000  | 1.476142000  |
| 6    | 0.233013000  | 3.719866000  | 1.323127000  |
| 1    | -0.714268000 | 3.491346000  | 1.802447000  |
| 6    | -2.531179000 | -1.739662000 | 2.477558000  |
| 6    | 4.047207000  | -1.472482000 | -2.409784000 |
| 6    | -5.020107000 | 1.359584000  | -1.277770000 |
| 1    | -5.382285000 | 1.027003000  | -0.304477000 |
| 1    | -5.895036000 | 1.712607000  | -1.830248000 |

|   |              |              |              |
|---|--------------|--------------|--------------|
| 6 | -4.274363000 | 3.493291000  | -0.194782000 |
| 1 | -5.212585000 | 3.494476000  | 0.352896000  |
| 6 | -3.323501000 | 4.470396000  | 0.084151000  |
| 1 | -3.542576000 | 5.222569000  | 0.836419000  |
| 6 | 3.482635000  | 1.124262000  | 3.433278000  |
| 1 | 3.603445000  | 2.013414000  | 4.032319000  |
| 6 | 3.140443000  | -0.863282000 | 2.565604000  |
| 1 | 2.959404000  | -1.911469000 | 2.388825000  |
| 6 | 2.659976000  | 4.238166000  | 0.094601000  |
| 1 | 3.595340000  | 4.429191000  | -0.423287000 |
| 6 | 1.364637000  | 2.987255000  | 1.676369000  |
| 1 | 1.270635000  | 2.210165000  | 2.427723000  |
| 6 | 3.169031000  | -0.173931000 | 3.781367000  |
| 1 | 2.995835000  | -0.568788000 | 4.769069000  |
| 6 | -0.971706000 | 5.421315000  | -0.130879000 |
| 1 | -1.344572000 | 6.076062000  | 0.664490000  |
| 1 | -0.717078000 | 6.078030000  | -0.969303000 |
| 6 | -3.684364000 | -1.757761000 | -2.394295000 |
| 1 | -3.204987000 | -2.693524000 | -2.156858000 |
| 6 | -4.213996000 | -1.303556000 | -3.606826000 |
| 1 | -4.210848000 | -1.809602000 | -4.558379000 |
| 6 | -4.758122000 | -0.071742000 | -3.310184000 |
| 1 | -5.277788000 | 0.645276000  | -3.926410000 |
| 8 | 2.963891000  | 1.055857000  | -1.264181000 |
| 6 | 1.684126000  | 1.180859000  | -1.339474000 |
| 6 | 0.916843000  | 0.000353000  | -0.762311000 |
| 8 | 1.047779000  | 2.084742000  | -1.852287000 |
| 6 | -0.434960000 | 0.071339000  | -0.446924000 |
| 7 | 1.598894000  | -1.151437000 | -0.607640000 |
| 7 | -1.116359000 | -1.023478000 | -0.088302000 |
| 1 | -0.954004000 | 1.019686000  | -0.474752000 |
| 6 | 0.888543000  | -2.268016000 | -0.375674000 |
| 6 | -0.482151000 | -2.212623000 | -0.167463000 |
| 1 | 1.402140000  | -3.220138000 | -0.348454000 |
| 6 | -1.350078000 | -3.467758000 | -0.099213000 |
| 8 | -0.812398000 | -4.552024000 | -0.213342000 |
| 8 | -2.613296000 | -3.203632000 | -0.005784000 |

Cartesian coordinates of the optimized structure of 2 (Mesocate).

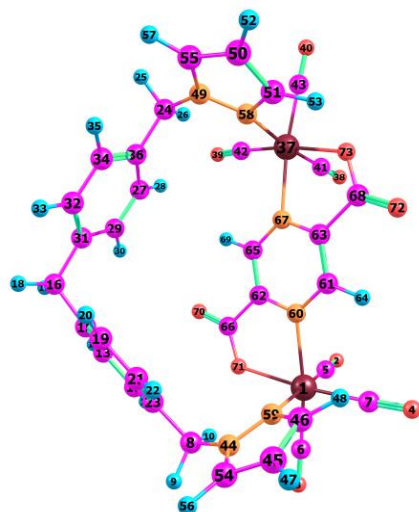

| Atom | X            | Y            | Z            |
|------|--------------|--------------|--------------|
| 75   | -3.574013000 | -1.358657000 | -0.256007000 |
| 8    | -3.136706000 | -3.416563000 | -2.519024000 |
| 8    | -6.584728000 | -1.237881000 | -0.966516000 |
| 8    | -4.074551000 | -3.666115000 | 1.733352000  |
| 6    | -3.298034000 | -2.651972000 | -1.675262000 |
| 6    | -5.468213000 | -1.299214000 | -0.693302000 |
| 6    | -3.914342000 | -2.803252000 | 0.980893000  |
| 6    | -4.703929000 | 2.157389000  | 0.175598000  |
| 1    | -5.655903000 | 2.688181000  | 0.268666000  |
| 1    | -4.781136000 | 1.485333000  | -0.675627000 |
| 6    | -3.287870000 | 3.565855000  | -1.339786000 |
| 1    | -3.880959000 | 3.196216000  | -2.169327000 |
| 6    | -2.224718000 | 4.426710000  | -1.593005000 |
| 1    | -2.018038000 | 4.723123000  | -2.616481000 |
| 6    | -1.390675000 | 4.861329000  | -0.562438000 |
| 6    | -0.146644000 | 5.685640000  | -0.846629000 |
| 1    | -0.187365000 | 6.065411000  | -1.871413000 |
| 1    | -0.117350000 | 6.561074000  | -0.190075000 |
| 6    | -1.679081000 | 4.442142000  | 0.738782000  |
| 1    | -1.045290000 | 4.761595000  | 1.560918000  |
| 6    | -2.744320000 | 3.587003000  | 0.997303000  |
| 1    | -2.917242000 | 3.261528000  | 2.017377000  |
| 6    | -3.552115000 | 3.124018000  | -0.043777000 |
| 6    | 4.617284000  | 2.372892000  | -0.016134000 |
| 1    | 5.508688000  | 3.000338000  | 0.062492000  |
| 1    | 4.777406000  | 1.709150000  | -0.859468000 |
| 6    | 2.614789000  | 3.102087000  | -1.383680000 |
| 1    | 2.897376000  | 2.379760000  | -2.141612000 |
| 6    | 1.494999000  | 3.902785000  | -1.591162000 |
| 1    | 0.898030000  | 3.756441000  | -2.485482000 |
| 6    | 1.116500000  | 4.865066000  | -0.651154000 |
| 6    | 1.900973000  | 5.008192000  | 0.496936000  |
| 1    | 1.639942000  | 5.761415000  | 1.234890000  |
| 6    | 3.014040000  | 4.201687000  | 0.711256000  |
| 1    | 3.596184000  | 4.339156000  | 1.617404000  |

|    |              |              |              |
|----|--------------|--------------|--------------|
| 6  | 3.381346000  | 3.229452000  | -0.222255000 |
| 75 | 3.611129000  | -1.305024000 | -0.283507000 |
| 8  | 3.087991000  | -3.770816000 | -2.068445000 |
| 8  | 4.106525000  | 0.273690000  | -2.884316000 |
| 8  | 6.605600000  | -2.074232000 | -0.106327000 |
| 6  | 3.278753000  | -2.847201000 | -1.411221000 |
| 6  | 3.948944000  | -0.299719000 | -1.887988000 |
| 6  | 5.496549000  | -1.784568000 | -0.186927000 |
| 7  | -4.574761000 | 1.345049000  | 1.387254000  |
| 6  | -4.435883000 | 0.808827000  | 3.530035000  |
| 6  | -3.807861000 | -0.150694000 | 2.730358000  |
| 1  | -4.540329000 | 0.809454000  | 4.602731000  |
| 1  | -3.335238000 | -1.072286000 | 3.030292000  |
| 7  | 4.605208000  | 1.559667000  | 1.206123000  |
| 6  | 4.749443000  | 1.002836000  | 3.343008000  |
| 6  | 4.142342000  | -0.015612000 | 2.602824000  |
| 1  | 4.970027000  | 1.007925000  | 4.398006000  |
| 1  | 3.808337000  | -0.990712000 | 2.917527000  |
| 6  | -4.910565000 | 1.745826000  | 2.634213000  |
| 6  | 5.029625000  | 1.985842000  | 2.417886000  |
| 1  | -5.446647000 | 2.669697000  | 2.786124000  |
| 1  | 5.503033000  | 2.949037000  | 2.525071000  |
| 7  | 4.046281000  | 0.318255000  | 1.306625000  |
| 7  | -3.888934000 | 0.169193000  | 1.431620000  |
| 7  | -1.369962000 | -1.164172000 | 0.039875000  |
| 6  | -0.573805000 | -1.843720000 | 0.877476000  |
| 6  | -0.782753000 | -0.319039000 | -0.832109000 |
| 6  | 0.808021000  | -1.738832000 | 0.805717000  |
| 1  | -1.020801000 | -2.509394000 | 1.603402000  |
| 6  | 0.600573000  | -0.228506000 | -0.915085000 |
| 6  | -1.693820000 | 0.506175000  | -1.732939000 |
| 7  | 1.398824000  | -0.961253000 | -0.124140000 |
| 6  | 1.709925000  | -2.506703000 | 1.761769000  |
| 1  | 1.049573000  | 0.427738000  | -1.647021000 |
| 8  | -1.187329000 | 1.278031000  | -2.527863000 |
| 8  | -2.950036000 | 0.289820000  | -1.526496000 |
| 8  | 1.199011000  | -3.110285000 | 2.686711000  |
| 8  | 2.966798000  | -2.394098000 | 1.484985000  |

Cartesian coordinates of the optimized structure of 3 (Helicate)

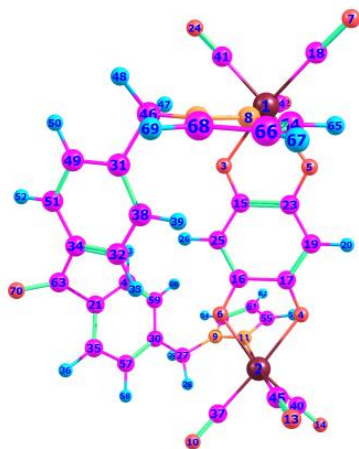

| Atom | X            | Y            | Z            |
|------|--------------|--------------|--------------|
| 75   | -4.341940000 | -0.944405000 | 0.521146000  |
| 75   | 3.748583000  | -1.210362000 | -0.776484000 |
| 8    | -2.470096000 | 0.098752000  | 0.955786000  |
| 8    | 1.996123000  | -2.532067000 | -0.447102000 |
| 8    | -2.705707000 | -2.279599000 | -0.110955000 |
| 8    | 2.067736000  | 0.071475000  | -0.205171000 |
| 8    | -6.642398000 | -2.693506000 | -0.554571000 |
| 7    | -4.014444000 | 0.016339000  | -1.523208000 |
| 7    | 4.421375000  | -0.316901000 | 2.371027000  |
| 8    | 5.935779000  | 0.869167000  | -1.380289000 |
| 7    | 3.971589000  | -1.249539000 | 1.484047000  |
| 7    | -3.929759000 | 1.328200000  | -1.890668000 |
| 8    | 3.107594000  | -1.230477000 | -3.799869000 |
| 8    | 5.797406000  | -3.484170000 | -1.151054000 |
| 6    | -1.386011000 | -0.448780000 | 0.577337000  |
| 6    | 0.954995000  | -0.480667000 | 0.056136000  |
| 6    | 0.875047000  | -1.970594000 | -0.231355000 |
| 6    | -5.805076000 | -2.022739000 | -0.131122000 |
| 6    | -0.367991000 | -2.601438000 | -0.281661000 |
| 1    | -0.448578000 | -3.638603000 | -0.583884000 |
| 6    | 2.176987000  | 4.020550000  | 0.749409000  |
| 8    | -4.511118000 | -2.358381000 | 3.262987000  |
| 6    | -1.514873000 | -1.861186000 | 0.023179000  |
| 8    | -6.355769000 | 1.158422000  | 1.531209000  |
| 6    | -0.147966000 | 0.183597000  | 0.590041000  |
| 1    | -0.073995000 | 1.215944000  | 0.892467000  |
| 6    | 4.993734000  | 0.980460000  | 1.996898000  |
| 1    | 5.720772000  | 0.815790000  | 1.204050000  |
| 1    | 5.562952000  | 1.302206000  | 2.873285000  |
| 6    | 3.996488000  | 2.054342000  | 1.595914000  |
| 6    | -2.597170000 | 3.177631000  | -0.826088000 |
| 6    | -0.183121000 | 3.207379000  | -0.905044000 |
| 1    | 0.743116000  | 2.711071000  | -1.172022000 |
| 6    | -0.151708000 | 4.412106000  | -0.198369000 |
| 6    | 3.496008000  | 4.036508000  | 0.289720000  |

|   |              |              |              |
|---|--------------|--------------|--------------|
| 1 | 3.805012000  | 4.796891000  | -0.419299000 |
| 6 | 5.121791000  | 0.083083000  | -1.131391000 |
| 6 | -1.394359000 | 2.609040000  | -1.236687000 |
| 1 | -1.387870000 | 1.664228000  | -1.766023000 |
| 6 | 5.052792000  | -2.612246000 | -1.030539000 |
| 6 | -5.615699000 | 0.359869000  | 1.140856000  |
| 6 | 1.802497000  | 3.056684000  | 1.691371000  |
| 1 | 0.790606000  | 3.051133000  | 2.082141000  |
| 6 | -4.454731000 | -1.833463000 | 2.240906000  |
| 6 | 3.352585000  | -1.227570000 | -2.675831000 |
| 6 | -3.920006000 | 2.439751000  | -0.939420000 |
| 1 | -4.168634000 | 2.017642000  | 0.031768000  |
| 1 | -4.729137000 | 3.123422000  | -1.209688000 |
| 6 | -2.570170000 | 4.420448000  | -0.178275000 |
| 1 | -3.500557000 | 4.891165000  | 0.127206000  |
| 6 | -1.361885000 | 5.043591000  | 0.113223000  |
| 1 | -1.344757000 | 6.002182000  | 0.620439000  |
| 6 | 4.304622000  | -0.780601000 | 3.638461000  |
| 1 | 4.620489000  | -0.176414000 | 4.474501000  |
| 6 | 3.573952000  | -2.292884000 | 2.221565000  |
| 1 | 3.169208000  | -3.162778000 | 1.728796000  |
| 6 | 4.388233000  | 3.046229000  | 0.691025000  |
| 1 | 5.387212000  | 3.028621000  | 0.267979000  |
| 6 | 2.708523000  | 2.098332000  | 2.128013000  |
| 1 | 2.385682000  | 1.350465000  | 2.844547000  |
| 6 | 3.761723000  | -2.047198000 | 3.586289000  |
| 1 | 3.538544000  | -2.701781000 | 4.412859000  |
| 6 | 1.163729000  | 5.004978000  | 0.226028000  |
| 6 | -3.952142000 | -0.683822000 | -2.661038000 |
| 1 | -3.996044000 | -1.760925000 | -2.623871000 |
| 6 | -3.831959000 | 0.163659000  | -3.768965000 |
| 1 | -3.763443000 | -0.113093000 | -4.808368000 |
| 6 | -3.821951000 | 1.435756000  | -3.235066000 |
| 1 | -3.732038000 | 2.404481000  | -3.701524000 |
| 8 | 1.393028000  | 6.194678000  | 0.153219000  |

Cartesian coordinates of the optimized structure of 3 (Mesocate)

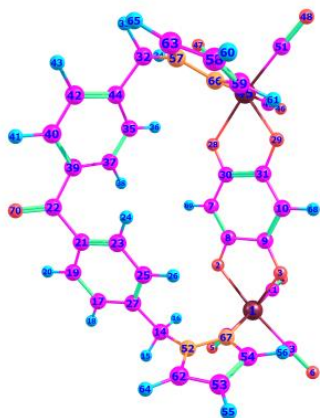

| Atom | X            | Y            | Z            |
|------|--------------|--------------|--------------|
| 75   | -4.279898000 | -1.289453000 | -0.176037000 |
| 8    | -2.493419000 | -0.331440000 | -1.032170000 |
| 8    | -2.553583000 | -1.924191000 | 1.033803000  |
| 8    | -4.037764000 | -3.717150000 | -2.074874000 |
| 8    | -6.422437000 | -0.087748000 | -2.037228000 |
| 8    | -6.446978000 | -2.769913000 | 1.439841000  |
| 6    | -0.137485000 | -0.320965000 | -1.155319000 |
| 6    | -1.357080000 | -0.699741000 | -0.596576000 |
| 6    | -1.392712000 | -1.618228000 | 0.620558000  |
| 6    | -0.204064000 | -2.064577000 | 1.202111000  |
| 6    | -4.128931000 | -2.814398000 | -1.368570000 |
| 6    | -5.635919000 | -0.553198000 | -1.329436000 |
| 6    | -5.657797000 | -2.209124000 | 0.812309000  |
| 6    | -4.311729000 | 2.396325000  | -0.228961000 |
| 1    | -5.203356000 | 2.986002000  | -0.453600000 |
| 1    | -4.260945000 | 1.588879000  | -0.957812000 |
| 6    | -3.018492000 | 4.378510000  | -1.127999000 |
| 1    | -3.916425000 | 4.704289000  | -1.645266000 |
| 6    | -1.835214000 | 5.092471000  | -1.292392000 |
| 1    | -1.804724000 | 5.977709000  | -1.917864000 |
| 6    | -0.659607000 | 4.662959000  | -0.668061000 |
| 6    | 0.628679000  | 5.405849000  | -0.880438000 |
| 6    | -0.713158000 | 3.547451000  | 0.177117000  |
| 1    | 0.177243000  | 3.216955000  | 0.696832000  |
| 6    | -1.897846000 | 2.850496000  | 0.357373000  |
| 1    | -1.911424000 | 1.985367000  | 1.009646000  |
| 6    | -3.055902000 | 3.239834000  | -0.316167000 |
| 8    | 2.205039000  | -0.589995000 | -1.081477000 |
| 8    | 2.149330000  | -2.121046000 | 1.024504000  |
| 6    | 1.046446000  | -0.825187000 | -0.615884000 |
| 6    | 1.012209000  | -1.724512000 | 0.613066000  |
| 6    | 5.190580000  | 1.960422000  | 0.074299000  |
| 1    | 6.128884000  | 2.475626000  | 0.287134000  |
| 1    | 5.388991000  | 1.231699000  | -0.705653000 |
| 6    | 3.043348000  | 2.485900000  | -1.122697000 |

|    |              |              |              |
|----|--------------|--------------|--------------|
| 1  | 3.045478000  | 1.480346000  | -1.524557000 |
| 6  | 1.937121000  | 3.298433000  | -1.328956000 |
| 1  | 1.099774000  | 2.919555000  | -1.903252000 |
| 6  | 1.882282000  | 4.583874000  | -0.779552000 |
| 6  | 2.994359000  | 5.075460000  | -0.089409000 |
| 1  | 2.973839000  | 6.090050000  | 0.293283000  |
| 6  | 4.087695000  | 4.247304000  | 0.147442000  |
| 1  | 4.925854000  | 4.624490000  | 0.727095000  |
| 6  | 4.102267000  | 2.932170000  | -0.330793000 |
| 75 | 3.919334000  | -1.661327000 | -0.207409000 |
| 8  | 3.429444000  | -4.119481000 | -2.011309000 |
| 8  | 6.094407000  | -0.759532000 | -2.191837000 |
| 8  | 5.985699000  | -3.266716000 | 1.422681000  |
| 6  | 3.612161000  | -3.200607000 | -1.344609000 |
| 6  | 5.296806000  | -1.103867000 | -1.427148000 |
| 6  | 5.233691000  | -2.662642000 | 0.791027000  |
| 7  | -4.490241000 | 1.770223000  | 1.082466000  |
| 6  | -4.642823000 | 1.490455000  | 3.270237000  |
| 6  | -4.421749000 | 0.268222000  | 2.624090000  |
| 1  | -4.766176000 | 1.666464000  | 4.326441000  |
| 1  | -4.332272000 | -0.722476000 | 3.040980000  |
| 7  | 4.835447000  | 1.222693000  | 1.299969000  |
| 6  | 4.295036000  | 0.858645000  | 3.415083000  |
| 6  | 3.813676000  | -0.165248000 | 2.592185000  |
| 1  | 4.202864000  | 0.944719000  | 4.485550000  |
| 1  | 3.270713000  | -1.059906000 | 2.852303000  |
| 6  | -4.675308000 | 2.422425000  | 2.253205000  |
| 6  | 4.932453000  | 1.725320000  | 2.552500000  |
| 1  | -4.793478000 | 3.494565000  | 2.271360000  |
| 1  | 5.435586000  | 2.662551000  | 2.730512000  |
| 7  | 4.133446000  | 0.053787000  | 1.309697000  |
| 7  | -4.329382000 | 0.435503000  | 1.300208000  |
| 1  | -0.231337000 | -2.723214000 | 2.061794000  |
| 1  | -0.114725000 | 0.309900000  | -2.035389000 |
| 8  | 0.653396000  | 6.601970000  | -1.095098000 |



Cartesian coordinates of the optimized structure of 4 (Helicate)

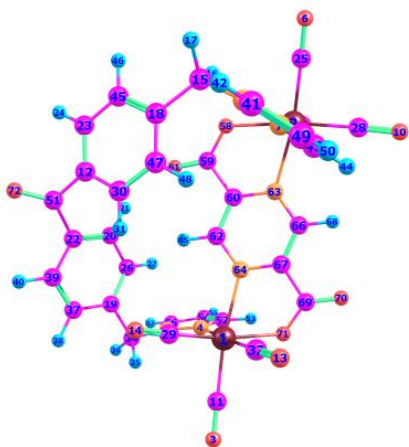

| Atom | X            | Y            | Z            |
|------|--------------|--------------|--------------|
| 75   | -3.106242000 | -1.368002000 | 0.761576000  |
| 75   | 3.876882000  | -0.813206000 | -0.605205000 |
| 8    | -5.938542000 | -2.160133000 | 1.728328000  |
| 7    | -3.879209000 | -1.096633000 | -1.371772000 |
| 7    | 3.652195000  | 1.310718000  | 2.001542000  |
| 8    | 6.789087000  | 0.237564000  | -0.596456000 |
| 7    | 3.493908000  | 0.048503000  | 1.503767000  |
| 7    | -4.641932000 | -0.119971000 | -1.949692000 |
| 8    | 4.267915000  | -1.940426000 | -3.454293000 |
| 8    | 4.777601000  | -3.509867000 | 0.598040000  |
| 6    | -4.885995000 | -1.852913000 | 1.382296000  |
| 6    | 0.052526000  | 4.564194000  | 0.315199000  |
| 8    | -1.957732000 | -2.048286000 | 3.547588000  |
| 8    | -3.396043000 | 1.473495000  | 1.917087000  |
| 6    | 3.763975000  | 2.516302000  | 1.178009000  |
| 1    | 4.144075000  | 2.215844000  | 0.203455000  |
| 1    | 4.518313000  | 3.152546000  | 1.648206000  |
| 6    | 2.455162000  | 3.268980000  | 0.989998000  |
| 6    | -4.179275000 | 2.223824000  | -1.148187000 |
| 6    | -1.961852000 | 3.152814000  | -1.400676000 |
| 1    | -0.950297000 | 3.050037000  | -1.776218000 |
| 6    | -2.302417000 | 4.226763000  | -0.573743000 |
| 6    | 1.283234000  | 5.119585000  | -0.050249000 |
| 1    | 1.299490000  | 6.039877000  | -0.623594000 |
| 6    | 5.713121000  | -0.169487000 | -0.597010000 |
| 6    | -2.903940000 | 2.173755000  | -1.705878000 |
| 1    | -2.616652000 | 1.342206000  | -2.340206000 |
| 6    | 4.467776000  | -2.495536000 | 0.139047000  |
| 6    | -3.343072000 | 0.426476000  | 1.425305000  |
| 6    | 0.043173000  | 3.401404000  | 1.089681000  |
| 1    | -0.900432000 | 2.978298000  | 1.417481000  |
| 6    | -2.387736000 | -1.793733000 | 2.511317000  |
| 6    | 4.125020000  | -1.524197000 | -2.392050000 |
| 6    | -5.148606000 | 1.058145000  | -1.248646000 |
| 1    | -5.452308000 | 0.738798000  | -0.250595000 |

|   |              |              |              |
|---|--------------|--------------|--------------|
| 1 | -6.061760000 | 1.351753000  | -1.772137000 |
| 6 | -4.545876000 | 3.347998000  | -0.399453000 |
| 1 | -5.543409000 | 3.414198000  | 0.026169000  |
| 6 | -3.624141000 | 4.354514000  | -0.134491000 |
| 1 | -3.904398000 | 5.210713000  | 0.469473000  |
| 6 | 3.539672000  | 1.305783000  | 3.349192000  |
| 1 | 3.616514000  | 2.226291000  | 3.906780000  |
| 6 | 3.289927000  | -0.732966000 | 2.573295000  |
| 1 | 3.164147000  | -1.796326000 | 2.446300000  |
| 6 | 2.468135000  | 4.466069000  | 0.264753000  |
| 1 | 3.411102000  | 4.872989000  | -0.089252000 |
| 6 | 1.233323000  | 2.772761000  | 1.443143000  |
| 1 | 1.194119000  | 1.870635000  | 2.043652000  |
| 6 | 3.307981000  | 0.008900000  | 3.758304000  |
| 1 | 3.180088000  | -0.351985000 | 4.765718000  |
| 6 | -1.239623000 | 5.195297000  | -0.129073000 |
| 6 | -3.662184000 | -2.001963000 | -2.334284000 |
| 1 | -3.115181000 | -2.899020000 | -2.093233000 |
| 6 | -4.263046000 | -1.614594000 | -3.537043000 |
| 1 | -4.260749000 | -2.144042000 | -4.475748000 |
| 6 | -4.876076000 | -0.413648000 | -3.250073000 |
| 1 | -5.461470000 | 0.252388000  | -3.864615000 |
| 8 | 2.974046000  | 1.018739000  | -1.332022000 |
| 6 | 1.691522000  | 1.110215000  | -1.393034000 |
| 6 | 0.962106000  | -0.083995000 | -0.794080000 |
| 8 | 1.028412000  | 1.999770000  | -1.898384000 |
| 6 | -0.390791000 | -0.045080000 | -0.483646000 |
| 7 | 1.678338000  | -1.209091000 | -0.599202000 |
| 7 | -1.044120000 | -1.145397000 | -0.093498000 |
| 1 | -0.936607000 | 0.885163000  | -0.534282000 |
| 6 | 0.998000000  | -2.338191000 | -0.334791000 |
| 6 | -0.376095000 | -2.317199000 | -0.133923000 |
| 1 | 1.539130000  | -3.273373000 | -0.272715000 |
| 6 | -1.214007000 | -3.590223000 | -0.021245000 |
| 8 | -0.651994000 | -4.664080000 | -0.109355000 |
| 8 | -2.482288000 | -3.351565000 | 0.078171000  |
| 8 | -1.412395000 | 6.396835000  | -0.122241000 |

Cartesian coordinates of the optimized structure of 4 (Mesocate)

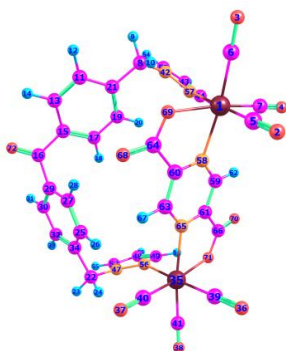

| Atom | X            | Y            | Z            |
|------|--------------|--------------|--------------|
| 75   | -3.638119000 | -1.380683000 | -0.294350000 |
| 8    | -3.137581000 | -3.406988000 | -2.572726000 |
| 8    | -6.621433000 | -1.227473000 | -1.104250000 |
| 8    | -4.216499000 | -3.714636000 | 1.640905000  |
| 6    | -3.320911000 | -2.654733000 | -1.722914000 |
| 6    | -5.516015000 | -1.300255000 | -0.794468000 |
| 6    | -4.027349000 | -2.841593000 | 0.907586000  |
| 6    | -4.621034000 | 2.195955000  | 0.150386000  |
| 1    | -5.568173000 | 2.740004000  | 0.155210000  |
| 1    | -4.614433000 | 1.538526000  | -0.717986000 |
| 6    | -3.487172000 | 4.254693000  | -0.777149000 |
| 1    | -4.398261000 | 4.479675000  | -1.324120000 |
| 6    | -2.368272000 | 5.062431000  | -0.949722000 |
| 1    | -2.403835000 | 5.921633000  | -1.610332000 |
| 6    | -1.167930000 | 4.747496000  | -0.305586000 |
| 6    | 0.076965000  | 5.546449000  | -0.549767000 |
| 6    | -1.137856000 | 3.662691000  | 0.575784000  |
| 1    | -0.224612000 | 3.423719000  | 1.107925000  |
| 6    | -2.265356000 | 2.880677000  | 0.775640000  |
| 1    | -2.213134000 | 2.043900000  | 1.461945000  |
| 6    | -3.439128000 | 3.142888000  | 0.069891000  |
| 6    | 4.797519000  | 2.184089000  | -0.118742000 |
| 1    | 5.742137000  | 2.725928000  | -0.043088000 |
| 1    | 4.899446000  | 1.473808000  | -0.933054000 |
| 6    | 2.556285000  | 2.738360000  | -1.133202000 |
| 1    | 2.607768000  | 1.807859000  | -1.683154000 |
| 6    | 1.409160000  | 3.517935000  | -1.210567000 |
| 1    | 0.556491000  | 3.157819000  | -1.776680000 |
| 6    | 1.352172000  | 4.747516000  | -0.545189000 |
| 6    | 2.478644000  | 5.206414000  | 0.143353000  |
| 1    | 2.450804000  | 6.183188000  | 0.614211000  |
| 6    | 3.602618000  | 4.394076000  | 0.261406000  |
| 1    | 4.452677000  | 4.743684000  | 0.840547000  |
| 6    | 3.639445000  | 3.134715000  | -0.347894000 |
| 75   | 3.568014000  | -1.477698000 | -0.262164000 |
| 8    | 3.008478000  | -3.995266000 | -1.960895000 |
| 8    | 4.114449000  | 0.005355000  | -2.908178000 |
| 8    | 6.545059000  | -2.299009000 | -0.038064000 |
| 6    | 3.212004000  | -3.053267000 | -1.334765000 |

|   |              |              |              |
|---|--------------|--------------|--------------|
| 6 | 3.937911000  | -0.534851000 | -1.897386000 |
| 6 | 5.443541000  | -1.988512000 | -0.136167000 |
| 7 | -4.598360000 | 1.359794000  | 1.351835000  |
| 6 | -4.565198000 | 0.799032000  | 3.491581000  |
| 6 | -4.015995000 | -0.214170000 | 2.699422000  |
| 1 | -4.696764000 | 0.802531000  | 4.561284000  |
| 1 | -3.641176000 | -1.178239000 | 3.003569000  |
| 7 | 4.669429000  | 1.420309000  | 1.134375000  |
| 6 | 4.631349000  | 0.979817000  | 3.302683000  |
| 6 | 4.031071000  | -0.051300000 | 2.574240000  |
| 1 | 4.776566000  | 1.034387000  | 4.369273000  |
| 1 | 3.635542000  | -0.993775000 | 2.915526000  |
| 6 | -4.917394000 | 1.786097000  | 2.594838000  |
| 6 | 5.020880000  | 1.896530000  | 2.350676000  |
| 1 | -5.352569000 | 2.762117000  | 2.743192000  |
| 1 | 5.519036000  | 2.848598000  | 2.443281000  |
| 7 | 4.040105000  | 0.212362000  | 1.258823000  |
| 7 | -4.025732000 | 0.122443000  | 1.402075000  |
| 7 | -1.426748000 | -1.224706000 | 0.052147000  |
| 6 | -0.644396000 | -1.921385000 | 0.889955000  |
| 6 | -0.815213000 | -0.400887000 | -0.824433000 |
| 6 | 0.741525000  | -1.848869000 | 0.818484000  |
| 1 | -1.105801000 | -2.570473000 | 1.622055000  |
| 6 | 0.568119000  | -0.367618000 | -0.926419000 |
| 6 | -1.697126000 | 0.491452000  | -1.688490000 |
| 7 | 1.352072000  | -1.105339000 | -0.126511000 |
| 6 | 1.628479000  | -2.605193000 | 1.798281000  |
| 1 | 1.027650000  | 0.250586000  | -1.682694000 |
| 8 | -1.162321000 | 1.310896000  | -2.415823000 |
| 8 | -2.958615000 | 0.286770000  | -1.515056000 |
| 8 | 1.102469000  | -3.191230000 | 2.725859000  |
| 8 | 2.889228000  | -2.495173000 | 1.538835000  |
| 8 | 0.062412000  | 6.747878000  | -0.726304000 |

**Table S1. Total Energy and difference in energies of complexes 1–4 (helicates and mesocates).**

| Complexes | Helicate              | Mesocate     | Energy Difference |          |
|-----------|-----------------------|--------------|-------------------|----------|
|           | Total Energy(Hartree) |              | Hartree           | kcal/mol |
| <b>1</b>  | –2399.502304          | –2399.503030 | 0.000726          | 0.456    |
| <b>2</b>  | –2509.055163          | –2509.061627 | 0.006464          | 4.056    |
| <b>3</b>  | –2473.529280          | –2473.537279 | 0.007999          | 5.019    |
| <b>4</b>  | –2583.086966          | –2583.093025 | 0.006059          | 3.802    |

**Table S2. Crystal data and structure refinement for 1.**

|                                      |                                                                                                                                                     |
|--------------------------------------|-----------------------------------------------------------------------------------------------------------------------------------------------------|
| Empirical formula                    | $C_{93}H_{80}N_8O_{20}Re_4$                                                                                                                         |
| Formula weight                       | 2374.45                                                                                                                                             |
| Temperature                          | 296(2) K                                                                                                                                            |
| Wavelength                           | 0.71073 Å                                                                                                                                           |
| Crystal system                       | Triclinic                                                                                                                                           |
| Space group                          | P-1                                                                                                                                                 |
| Unit cell dimensions                 | $a = 8.9621(4)$ Å $\alpha = 83.058(3)^\circ$ .<br>$b = 10.8991(3)$ Å $\beta = 86.516(3)^\circ$ .<br>$c = 23.4881(7)$ Å $\gamma = 79.937(3)^\circ$ . |
| Volume                               | 2240.59(14) Å <sup>3</sup>                                                                                                                          |
| Z                                    | 1                                                                                                                                                   |
| Density (calculated)                 | 1.760 mg/m <sup>3</sup>                                                                                                                             |
| Absorption coefficient               | 5.460 mm <sup>-1</sup>                                                                                                                              |
| F(000)                               | 1154                                                                                                                                                |
| Crystal size                         | 0.160 x 0.140 x 0.120 mm <sup>3</sup>                                                                                                               |
| Theta range for data collection      | 1.910 to 25.000°.                                                                                                                                   |
| Index ranges                         | -10 ≤ h ≤ 10, -12 ≤ k ≤ 12, -26 ≤ l ≤ 27                                                                                                            |
| Reflections collected                | 33548                                                                                                                                               |
| Independent reflections              | 7882 [ $R_{(int)} = 0.0792$ ]                                                                                                                       |
| Completeness to theta = 25.000°      | 100.0 %                                                                                                                                             |
| Absorption correction                | Semi-empirical from equivalents                                                                                                                     |
| Max. and min. transmission           | 0.560 and 0.475                                                                                                                                     |
| Refinement method                    | Full-matrix least-squares on F <sup>2</sup>                                                                                                         |
| Data / restraints / parameters       | 7882 / 642 / 695                                                                                                                                    |
| Goodness-of-fit on F <sup>2</sup>    | 1.007                                                                                                                                               |
| Final R indices [ $I > 2\sigma(I)$ ] | $R_1 = 0.0459$ , $wR_2 = 0.1137$                                                                                                                    |
| R indices (all data)                 | $R_1 = 0.0670$ , $wR_2 = 0.1289$                                                                                                                    |
| Extinction coefficient               | n/a                                                                                                                                                 |
| Largest diff. peak and hole          | 1.939 and -1.111 e.Å <sup>-3</sup>                                                                                                                  |

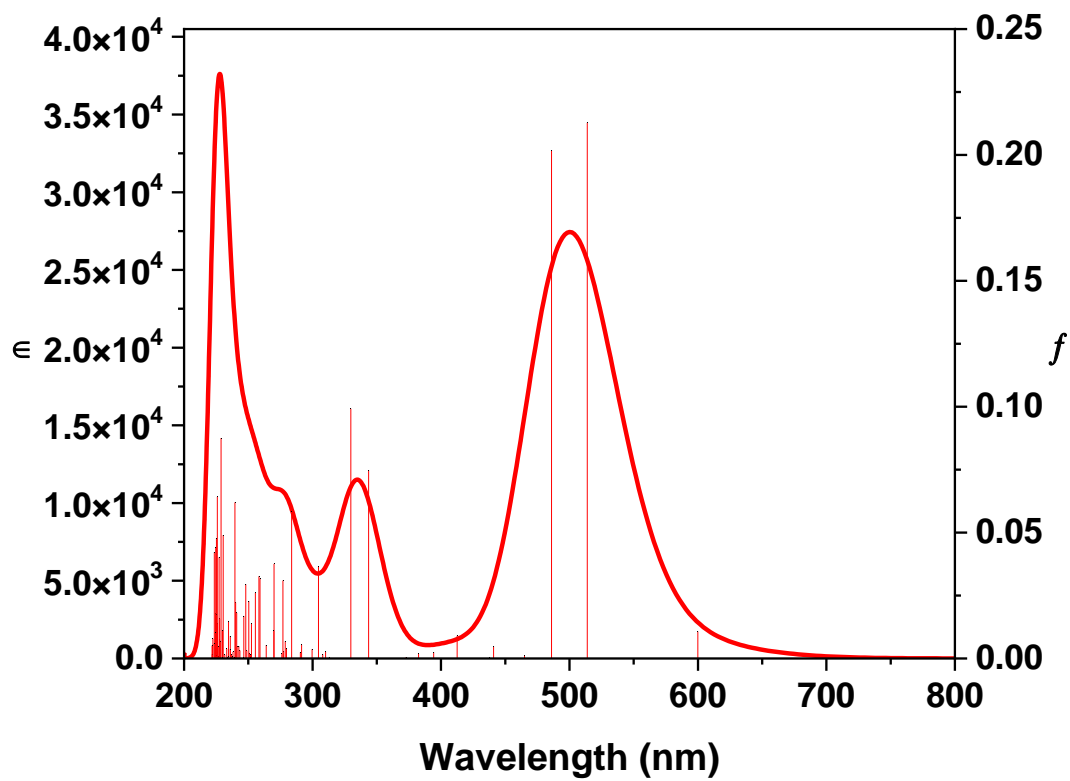

**Figure S26.** Simulated absorption spectrum of **1** in DMSO with oscillator strength ( $f$ ) values (shown as vertical bars, same color code).

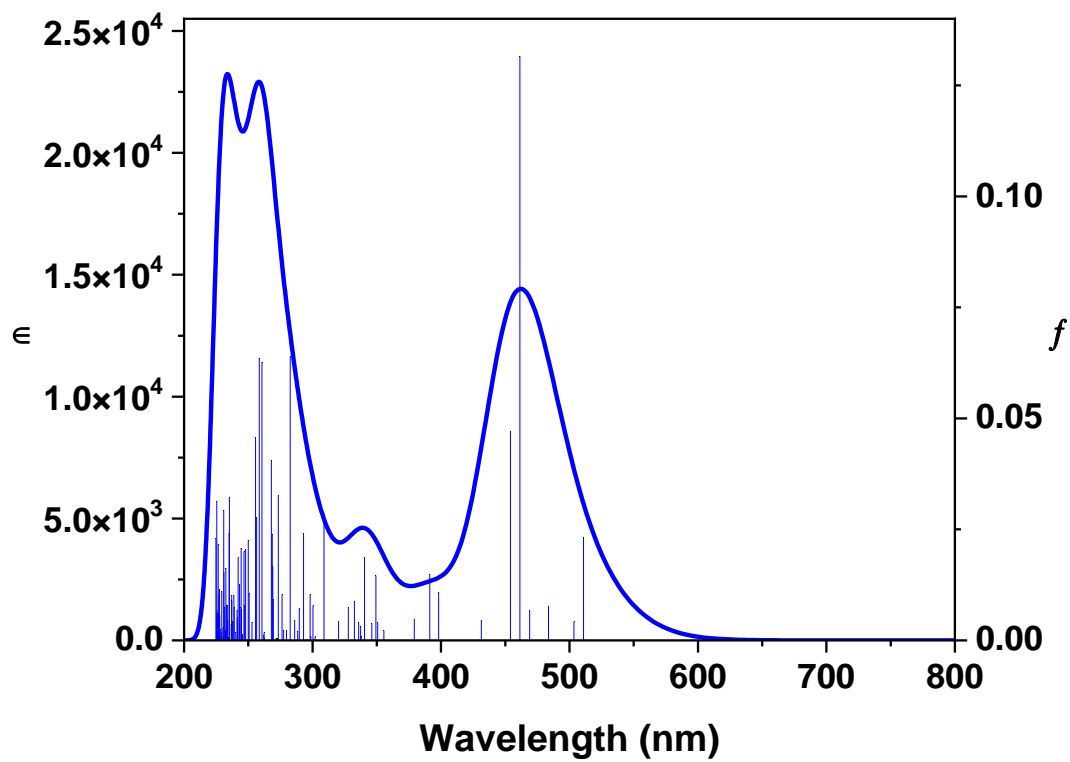

**Figure S27.** Simulated absorption spectrum of **2** in DMSO with oscillator strength ( $f$ ) values (shown as vertical bars, same color code).



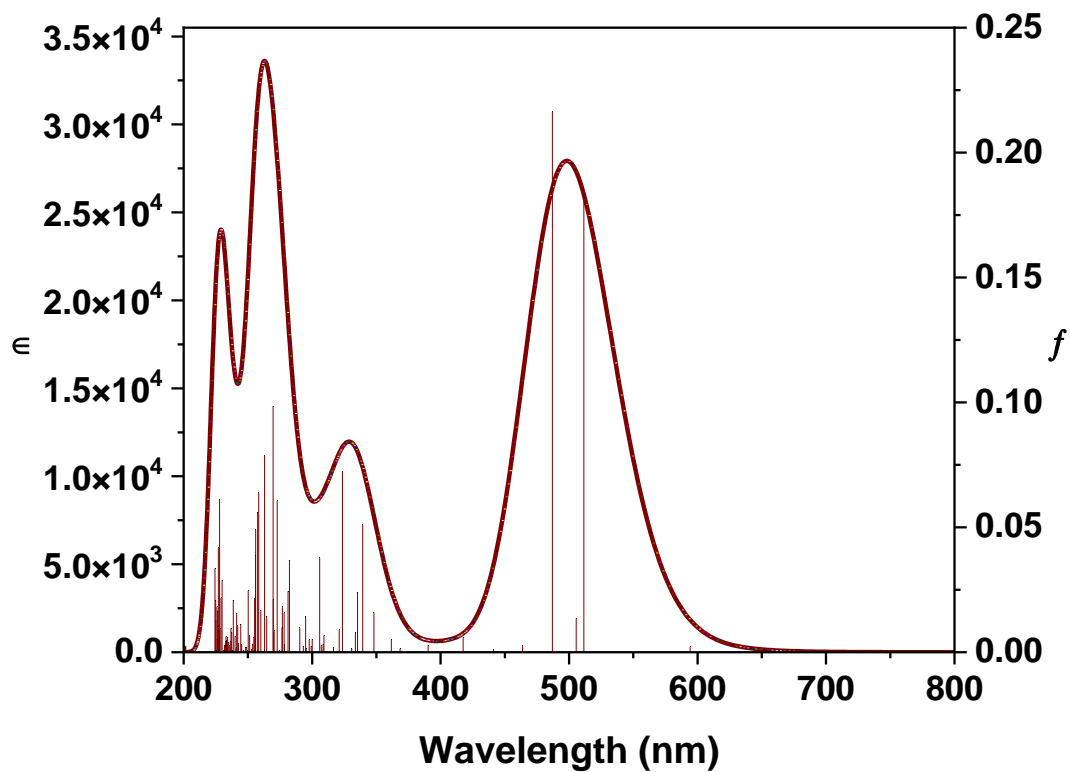

**Figure S28.** Simulated absorption spectrum of **3** in DMSO with oscillator strength ( $f$ ) values (shown as vertical bars, same color code).

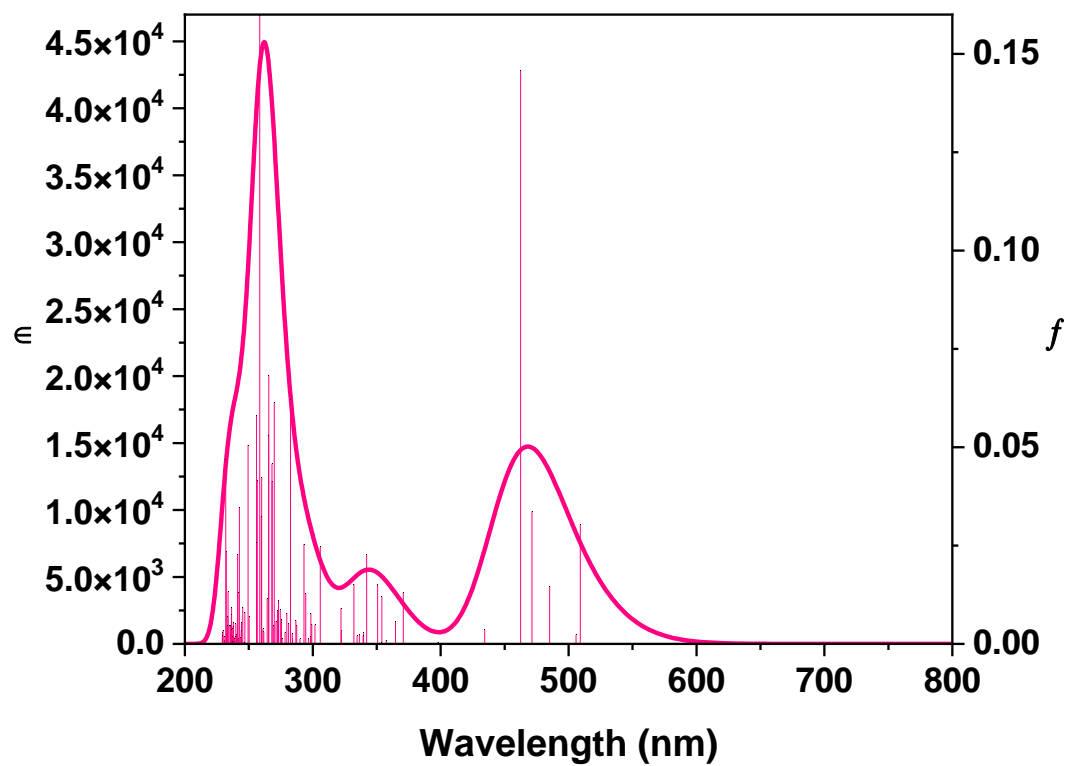

**Figure S29.** Simulated absorption spectrum of **4** in DMSO with oscillator strength ( $f$ ) values (shown as vertical bars, same color code).

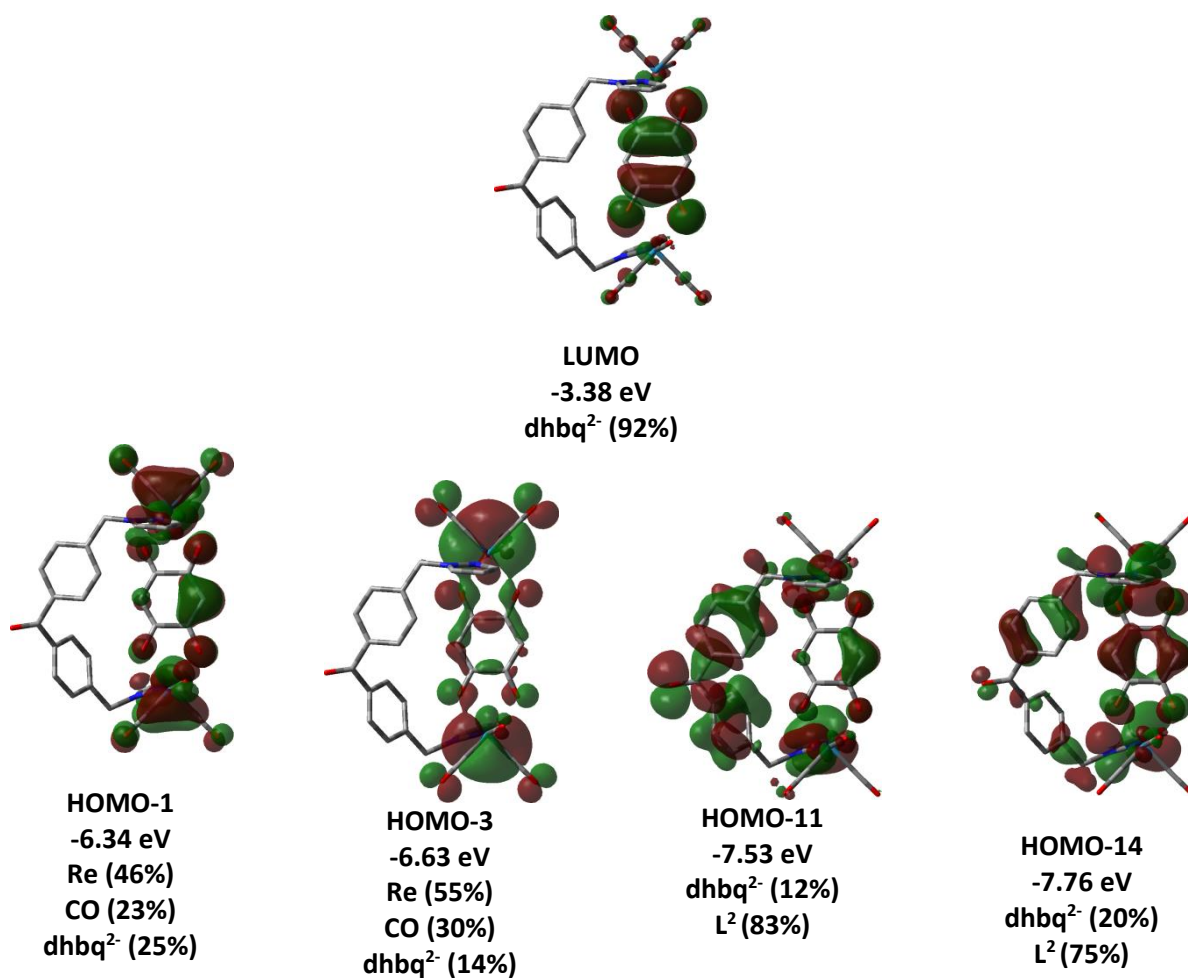

**Figure S30.** Frontier molecular orbitals involved in TDDFT/IEF-PCM transitions of **3**.

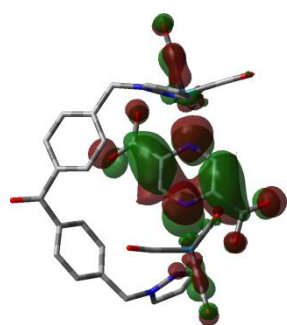

LUMO  
-3.42 eV  
pydc<sup>2-</sup> (91%)

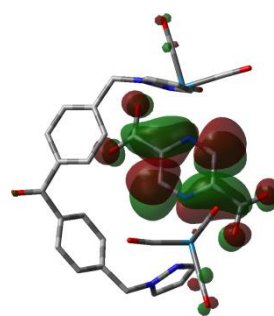

LUMO+1  
-2.37 eV  
pydc<sup>2-</sup> (95%)

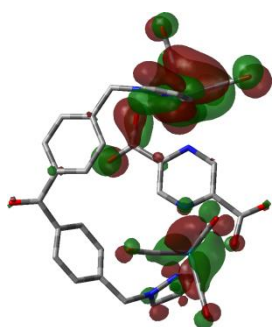

HOMO  
-6.55 eV  
Re (55%)  
CO (25%)  
pydc<sup>2-</sup> (10%)

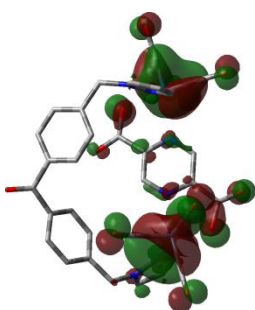

HOMO-2  
-6.7 eV  
Re (59%)  
CO (27%)  
pydc<sup>2-</sup> (10%)

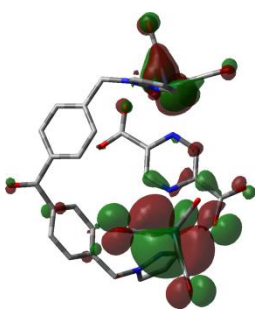

HOMO-3  
-6.76 eV  
Re (60%)  
CO (28%)  
pydc<sup>2-</sup> (8%)

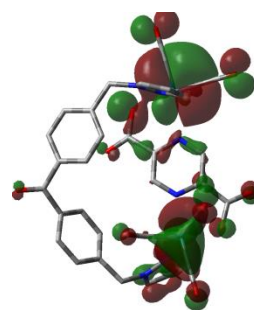

HOMO-4  
-6.81 eV  
Re (58%)  
CO (27%)  
pydc<sup>2-</sup> (9%)

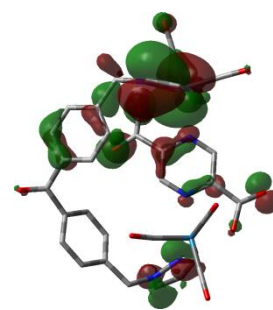

HOMO-15  
-8.1 eV  
pydc<sup>2-</sup> (14%)  
L<sup>2</sup> (78%)

Figure S31. Frontier molecular orbitals involved in TDDFT/IEF-PCM transitions of 4.

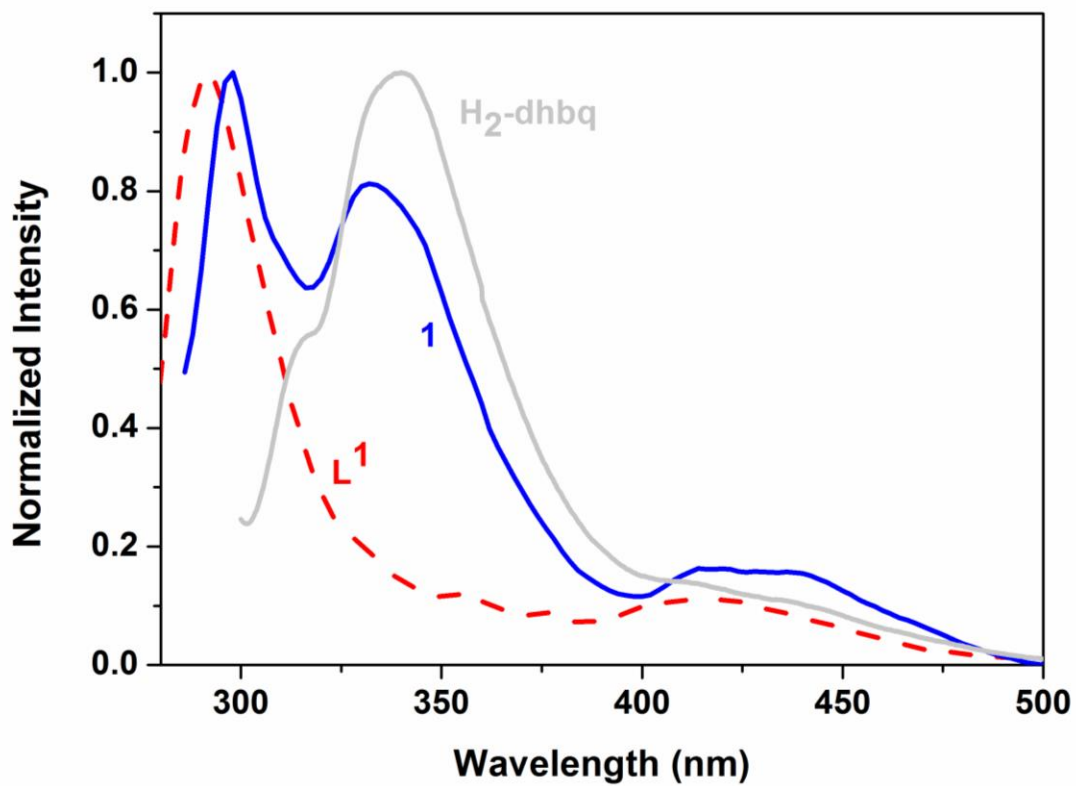

**Figure S32.** Emission spectra of **1** ( $\lambda_{\text{exc}} = 270$  nm), L<sup>1</sup> ( $\lambda_{\text{exc}} = 265$  nm), and H<sub>2</sub>-dhbq ( $\lambda_{\text{exc}} = 285$  nm) in DMSO.

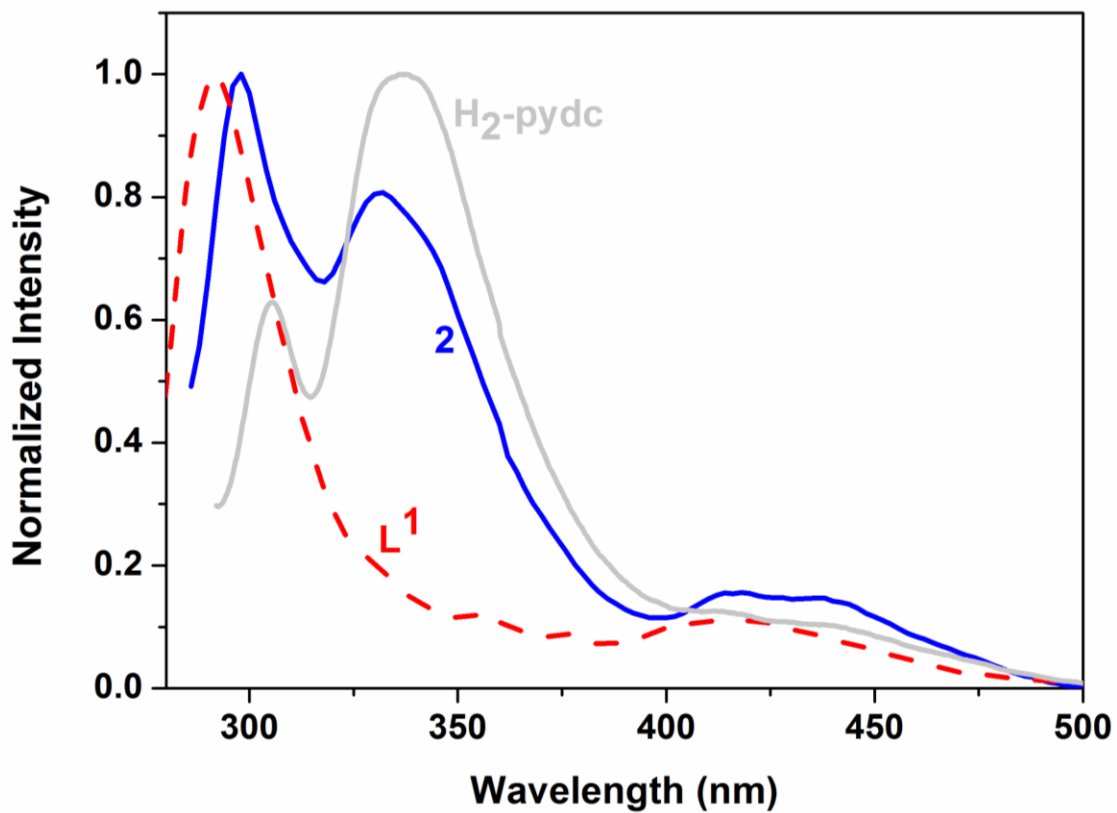

**Figure S33.** Emission spectra of **2** ( $\lambda_{\text{exc}} = 270$  nm),  $L^1$  ( $\lambda_{\text{exc}} = 265$  nm), and  $H_2$ -pydc ( $\lambda_{\text{exc}} = 277$  nm) in DMSO.

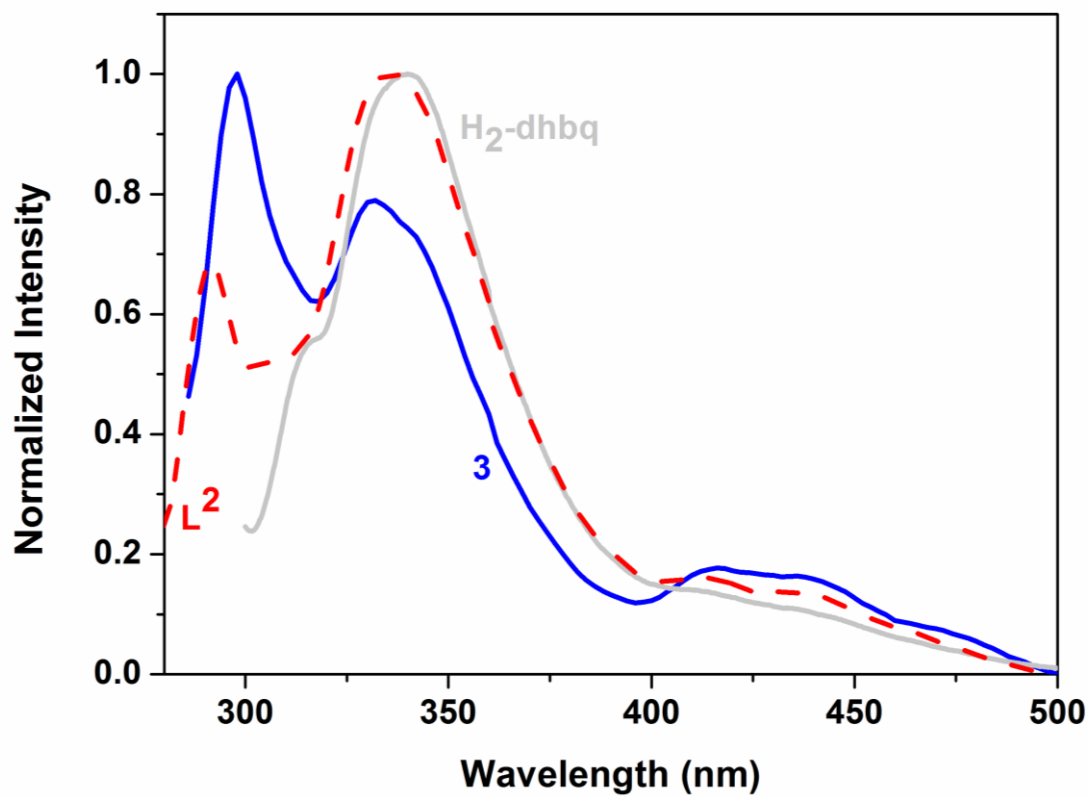

**Figure S34.** Emission spectra of **3** ( $\lambda_{\text{exc}} = 270 \text{ nm}$ ),  $L^2$  ( $\lambda_{\text{exc}} = 265 \text{ nm}$ ), and  $H_2\text{-dhbq}$  ( $\lambda_{\text{exc}} = 285 \text{ nm}$ ) in DMSO.

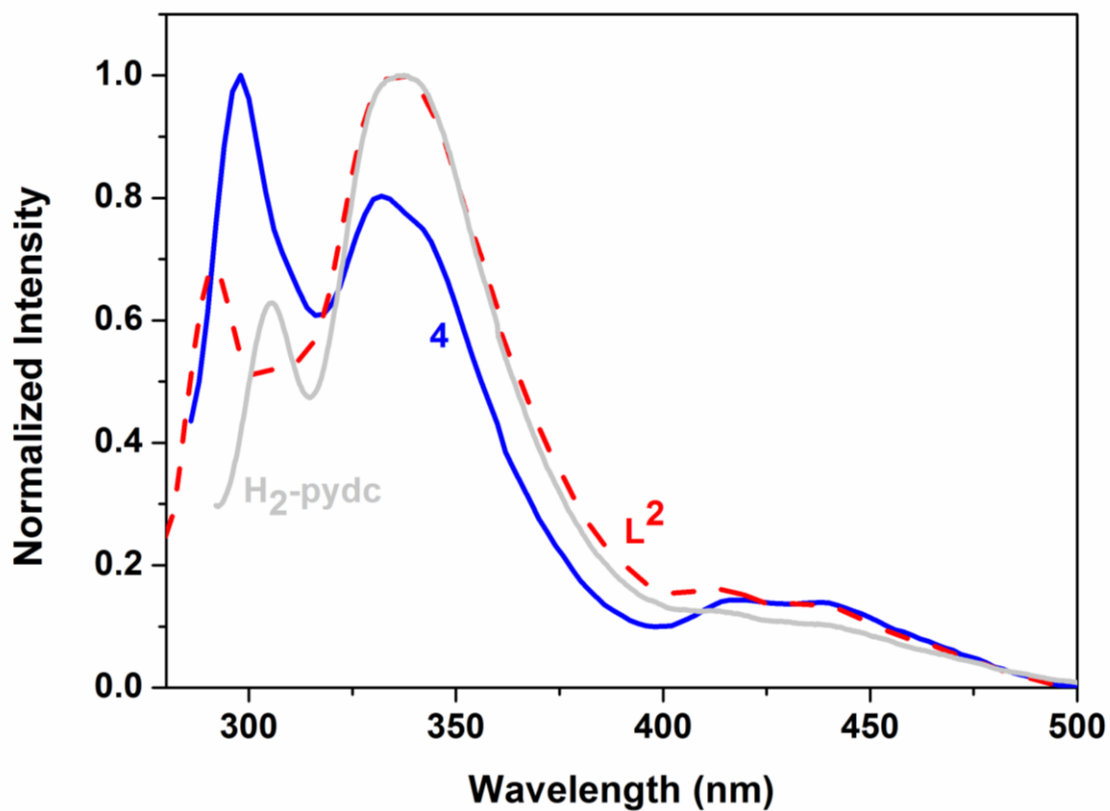

**Figure S35.** Emission spectra of **4** ( $\lambda_{\text{exc}} = 270 \text{ nm}$ ),  $L^2$  ( $\lambda_{\text{exc}} = 265 \text{ nm}$ ), and  $H_2\text{-pydc}$  ( $\lambda_{\text{exc}} = 277 \text{ nm}$ ) in DMSO.



**Table S3. Major singlet excited state transitions for 3 from TDDFT/IEF-PCM calculations with DMSO as the solvent model.**

| Trans band | Wavelength (nm) | Oscillator strength (f) | Major contribution [%]                | Character                                                                     |
|------------|-----------------|-------------------------|---------------------------------------|-------------------------------------------------------------------------------|
| 2          | 512             | 0.1824                  | H-3 → LUMO (30%),<br>H-1 → LUMO (61%) | Re (46%)<br>CO (23 %) → dhbq <sup>2-</sup> (92%)<br>dhbq <sup>2-</sup> (25%)  |
| 4          | 487             | 0.2164                  | H-3 → LUMO (65%),<br>H-1 → LUMO (32%) | Re (55%)<br>CO (30 %) → dhbq <sup>2-</sup> (92%)<br>dhbq <sup>2-</sup> (14 %) |
| 12         | 339             | 0.0512                  | H-11 → LUMO (84%)                     | dhbq <sup>2-</sup> (12 %)<br>L <sup>2</sup> (83%) → dhbq <sup>2-</sup> 92%)   |
| 16         | 324             | 0.0725                  | H-14 → LUMO (76%)                     | dhbq <sup>2-</sup> (20 %)<br>L <sup>2</sup> (75%) → dhbq <sup>2-</sup> 92%)   |

**Table S4. Major singlet excited state transitions for 4 from TDDFT/IEF-PCM calculations with DMSO as the solvent model.**

| Trans band | Wavelength (nm) | Oscillator strength (f) | Major contribution [%]                                     | Character                                                                    |
|------------|-----------------|-------------------------|------------------------------------------------------------|------------------------------------------------------------------------------|
| 1          | 509             | 0.0304                  | HOMO → LUMO (90%)                                          | Re (55%)<br>CO (25%)<br>pydc <sup>2-</sup> 10%) → pydc <sup>2-</sup> (91%)   |
| 5          | 463             | 0.1457                  | H-4 → LUMO (39%),<br>H-3 → LUMO (29%),<br>H-2 → LUMO (20%) | Re (58%)<br>CO (27%)<br>pydc <sup>2-</sup> (9%) → pydc <sup>2-</sup> (91%)   |
| 14         | 342             | 0.0227                  | H-2 → L+1 (92%)                                            | Re (59%)<br>CO (27%)<br>pydc <sup>2-</sup> (10%) → pydc <sup>2-</sup> (95%)  |
| 23         | 306             | 0.0247                  | H-15 → LUMO (96%)                                          | pydc <sup>2-</sup> (14 %)<br>L <sup>2</sup> (78%) → pydc <sup>2-</sup> (91%) |

**Table S5. Free energies of activation calculated from the coalescence temperatures and the chemical shifts (<sup>1</sup>H NMR, 500 MHz) of the signals of dhbq<sup>2-</sup> protons in **1** and **3**, pydc<sup>2-</sup> protons in **2** and **4**.**

|          | $\delta$ (ppm) | $\delta$ (ppm) | $\Delta\delta$ (ppm) | $\Delta\nu$ (Hz) | $T_c$ (K) | $\Delta G^\ddagger$ (J/mol) | $\Delta G^\ddagger$ (Kcal/mol) |
|----------|----------------|----------------|----------------------|------------------|-----------|-----------------------------|--------------------------------|
| <b>1</b> | 5.787          | 5.785          | 0.002                | 1                | 373       | 89565                       | 21.4                           |
| <b>3</b> | 5.788          | 5.786          | 0.002                | 1                | 373       | 89565                       | 21.4                           |
| <b>2</b> | 9.144          | 9.124          | 0.02                 | 10               | 358       | 78988                       | 18.8                           |
| <b>4</b> | 9.144          | 9.124          | 0.02                 | 10               | 358       | 78988                       | 18.8                           |

$$\Delta G^\ddagger = RT_c \left[ 22.96 + \ln \left( \frac{T_c}{\Delta\nu} \right) \right]$$

Where:

R is the gas constant.

$\Delta\nu$  is the chemical shift difference (Hz) between the two exchanging nuclei at temperature below coalescence.

$T_c$  is the coalescence temperature.

$\Delta G^\ddagger$  is the free energy of activation.
